# Supplementary material for: Thermosensitive hydrogel releasing nitric oxide donor and anti-CTLA-4 micelles for anti-tumor immunotherapy
Source: PubMed Central journal article supplement (PMC8933465; doi:10.1038/s41467-022-29121-x), 2022-03-18
Supplement: 41467_2022_29121_MOESM1_ESM.pdf [file 41467_2022_29121_MOESM1_ESM.pdf]

**SUPPLEMENTARY INFORMATION**

**Thermosensitive hydrogel releasing nitric oxide donor and anti-CTLA-4 micelles for anti-tumor immunotherapy**

Jihoon Kim<sup>1,2</sup>, David M. Francis<sup>1,3</sup>, Lauren F. Sestito<sup>4,5</sup>, Paul A. Archer<sup>1,3</sup>, Margaret P. Manspeaker<sup>1,3</sup>, Meghan J. O'Melia<sup>4,5</sup>, Susan N. Thomas<sup>1,2,4,5,6\*</sup>

<sup>1</sup>Parker H. Petit Institute for Bioengineering and Bioscience, Georgia Institute of Technology, 315 Ferst Dr NW, Atlanta, Georgia 30332, USA

<sup>2</sup>George W. Woodruff School of Mechanical Engineering, Georgia Institute of Technology, 315 Ferst Dr NW, Atlanta, Georgia 30332, USA

<sup>3</sup>School of Chemical and Biomolecular Engineering, Georgia Institute of Technology, 315 Ferst Dr NW, Atlanta, Georgia 30332, USA

<sup>4</sup>Wallace H. Coulter Department of Biomedical Engineering, Georgia Institute of Technology, 313 Ferst Dr NW, Atlanta, Georgia 30332, USA

<sup>5</sup>Wallace H. Coulter Department of Biomedical Engineering, Emory University, 201 Dowman Drive, Atlanta, Georgia 30322, USA

<sup>6</sup>Winship Cancer Institute, Emory University School of Medicine, 1365-C Clifton Road NE, Atlanta, Georgia 30322, USA

\* Corresponding author: [susan.thomas@gatech.edu](mailto:susan.thomas@gatech.edu)

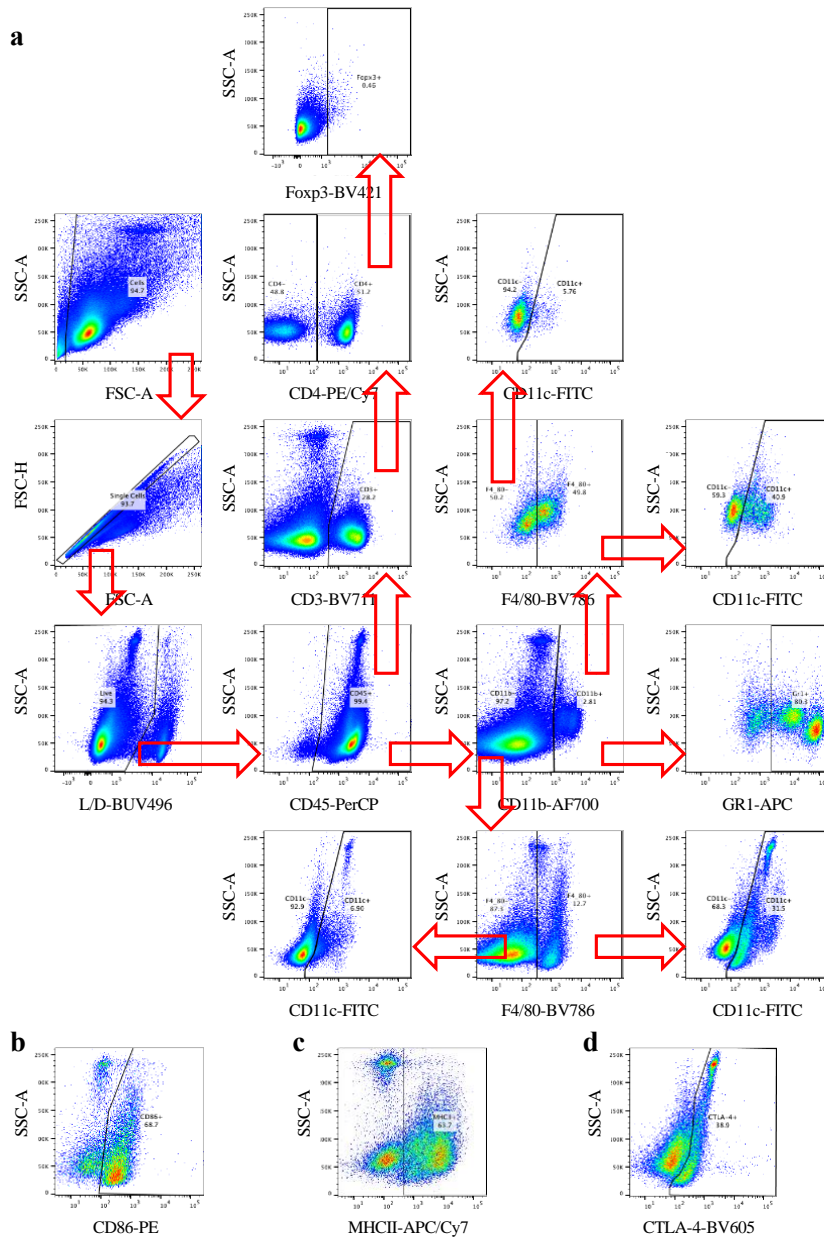

**Supplementary Figure 1. Gating strategy for analysis of immune cells in dLN, ndLN, and spleen after subcutaneous GSNO treatment.** Immune cells were profiled 1 day after treatment of GSNO ( $570 \mu\text{g kg}^{-1}$ ) in  $30 \mu\text{L}$  saline. LSR Fortessa flow cytometry and FlowJo were employed to analyze and profiles the stained cells. **a** Gating strategy to identify DCs, macrophages,  $\text{CD}3^+$  T,  $\text{CD}4^+$  T,  $\text{CD}4^-$  T,  $\text{T}_{\text{reg}}$ s, and MDSCs. **b-d** Gating strategy to determine positive signal of **(b)** CD86, **(c)** MHCII, and **(d)** CTLA-4 staining.

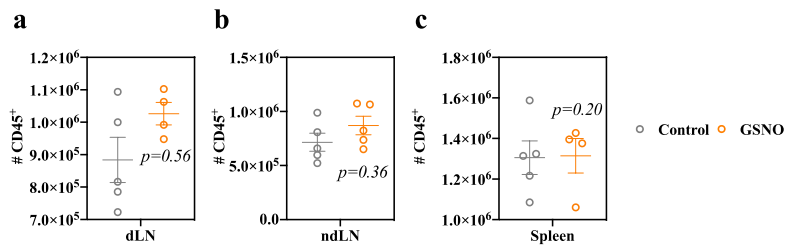

**Supplementary Figure 2. Total number of CD45<sup>+</sup> immune cells in dLN, ndLN, and spleen associated with subcutaneous GSNO treatment.** Immune cells were profiled 1 day after treatment of GSNO (570  $\mu\text{g kg}^{-1}$ ) in 30  $\mu\text{L}$  saline. **a-c** Number of CD45<sup>+</sup> in (a) dLN, (b) ndLN, and (c) spleen. Data are presented as individual biological replicates and mean  $\pm$  SEM. **a, c** n=5 for control and n=4 for GSNO. **b** n=5. \*\*\*\*\* $p < 0.0001$ , \*\*\*\* $p < 0.001$ , \*\*\* $p < 0.01$ , \*\* $p < 0.05$ , and \* $p < 0.1$  with two-tailed Student t-test. Source data are available in a Source Data file.

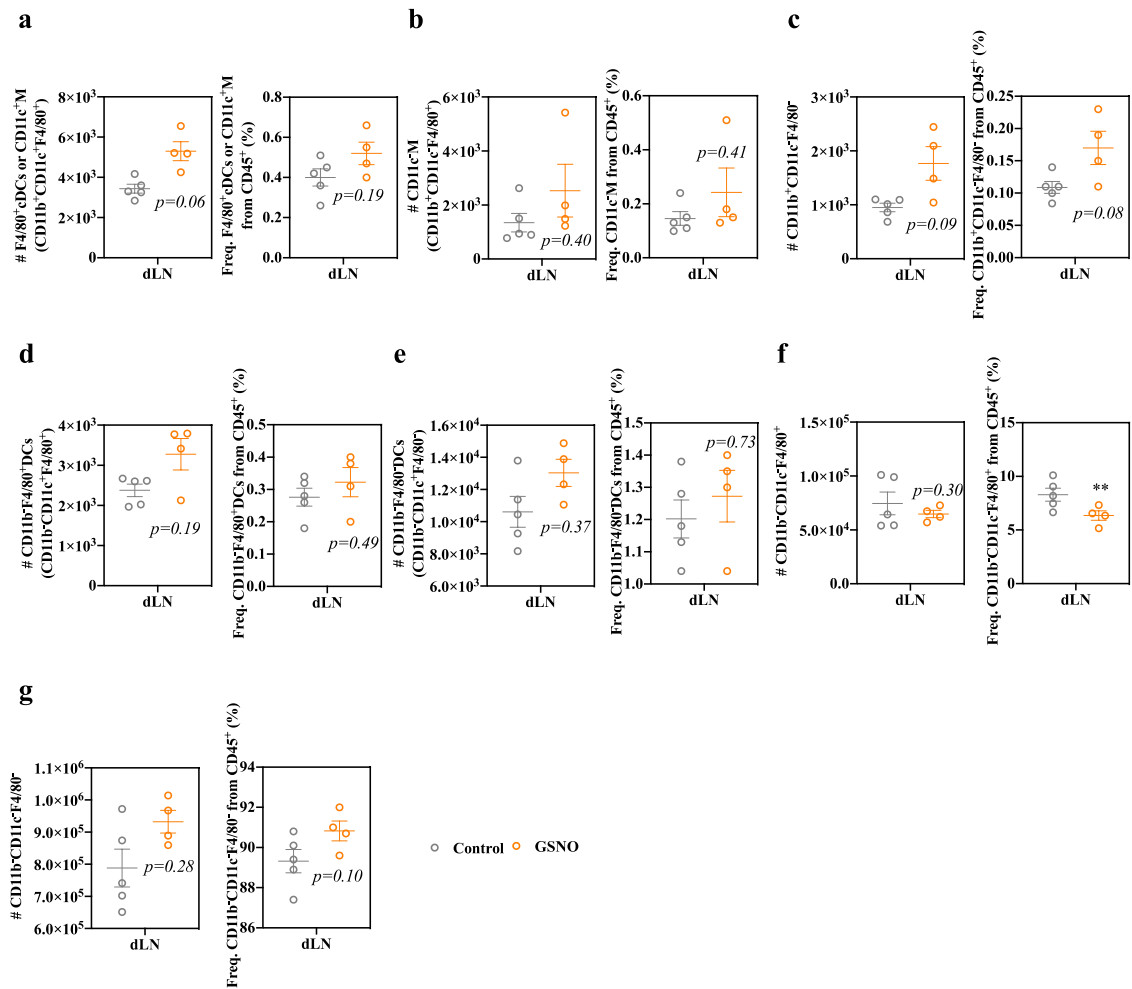

**Supplementary Figure 3. Profiles of CD11b, CD11c and/or F4/80 expressing immune cells in dLN associated with subcutaneous GSNO treatment.** Immune cells in dLN were profiled 1 day after treatment of GSNO ( $570 \mu\text{g kg}^{-1}$ ) in  $30 \mu\text{L}$  saline. **a-g** Number and percent populations of **(a)**  $\text{CD45}^+\text{CD11b}^+\text{CD11c}^+\text{F4/80}^+$  cDCs or macrophages ( $\text{F4/80}^+\text{cDCs}$  or  $\text{CD11c}^+\text{M}$ ), **(b)**  $\text{CD45}^+\text{CD11b}^+\text{CD11c}^-\text{F4/80}^+$  macrophages ( $\text{CD11c}^-\text{M}$ ), **(c)**  $\text{CD45}^+\text{CD11b}^+\text{CD11c}^-\text{F4/80}^-$  **(d)**  $\text{CD45}^+\text{CD11b}^-\text{CD11c}^+\text{F4/80}^+$  DCs ( $\text{CD11b}^-\text{F4/80}^+\text{DCs}$ ), **(e)**  $\text{CD45}^+\text{CD11b}^-\text{CD11c}^+\text{F4/80}^-$  DCs ( $\text{CD11b}^-\text{F4/80}^-\text{DCs}$ ), **(f)**  $\text{CD45}^+\text{CD11b}^-\text{CD11c}^-\text{F4/80}^+$ , and **(g)**  $\text{CD45}^+\text{CD11b}^-\text{CD11c}^-\text{F4/80}^-$ . Data are presented as individual biological replicates and  $\text{mean} \pm \text{SEM}$ .  $n=5$  for control and  $n=4$  for GSNO. \*\*\*\* $p < 0.0001$ , \*\*\* $p < 0.001$ , \*\* $p < 0.01$ , \* $p < 0.05$ , and  $p < 0.1$  with two-tailed Student t-test. Source data are available in a Source Data file.

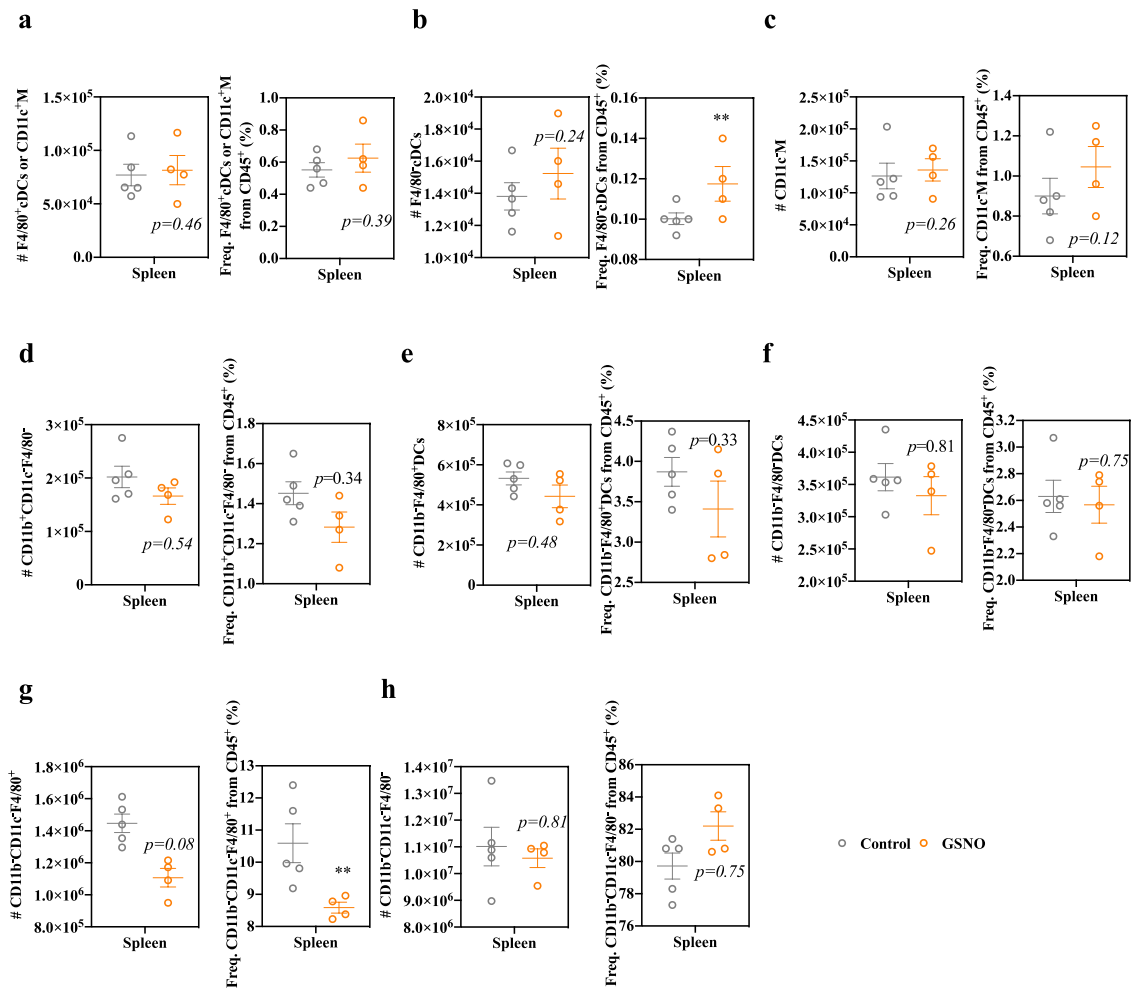

**Supplementary Figure 4. Profiles of CD11b, CD11c and/or F4/80 expressing immune cells in spleen associated with subcutaneous GSNO treatment.** Immune cells in spleen were profiled 1 day after treatment of GSNO ( $570 \mu\text{g kg}^{-1}$ ) in  $30 \mu\text{L}$  saline. **a-h** Number and percent populations of (a) F4/80<sup>+</sup>cDCs or CD11c<sup>+</sup>M, (b) F4/80<sup>+</sup>cDCs, (c) CD11c<sup>+</sup>M, (d) CD11b<sup>+</sup>CD11c<sup>+</sup>F4/80<sup>-</sup>, (e) CD11b<sup>-</sup>F4/80<sup>+</sup>DCs, (f) CD11b<sup>-</sup>F4/80<sup>+</sup>DCs, (g) CD11b<sup>-</sup>CD11c<sup>+</sup>F4/80<sup>+</sup>, and (h) CD11b<sup>-</sup>CD11c<sup>-</sup>F4/80<sup>-</sup>. Data are presented as mean $\pm$ SEM. n=5 for control and n=4 for GSNO. \*\*\*\* $p < 0.0001$ , \*\*\*\* $p < 0.001$ , \*\*\* $p < 0.01$ , \*\* $p < 0.05$ , and \* $p < 0.1$  with two-tailed Student t-test. Source data are available in a Source Data file.

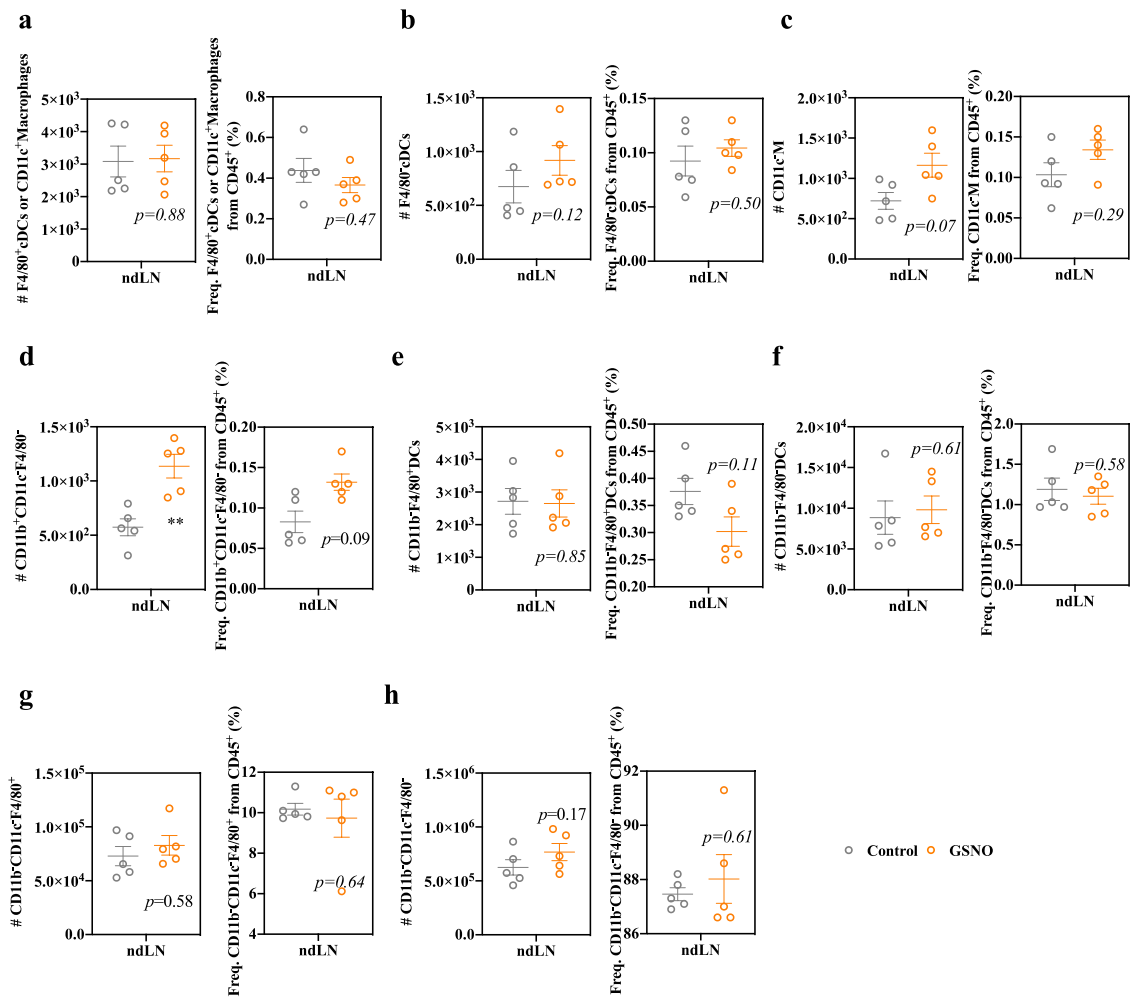

**Supplementary Figure 5. Profiles of CD11b, CD11c and/or F4/80 expressing immune cells in ndLN associated with subcutaneous GSNO treatment.** Immune cells in ndLN were profiled 1 day after treatment of GSNO ( $570 \mu\text{g kg}^{-1}$ ) in  $30 \mu\text{L}$  saline. **a-h** Number and percent populations of (a) F4/80<sup>+</sup>cDCs or CD11c<sup>+</sup>M, (b) F4/80<sup>+</sup>cDCs, (c) CD11c<sup>+</sup>M, (d) CD11b<sup>+</sup>CD11c<sup>+</sup>F4/80<sup>-</sup>, (e) CD11b<sup>+</sup>F4/80<sup>+</sup>DCs, (f) CD11b<sup>+</sup>F4/80<sup>-</sup>DCs, (g) CD11b<sup>+</sup>CD11c<sup>+</sup>F4/80<sup>+</sup>, and (h) CD11b<sup>+</sup>CD11c<sup>+</sup>F4/80<sup>-</sup>. Data are presented as individual biological replicates and mean $\pm$ SEM. n=5. \*\*\*\* $p < 0.0001$ , \*\*\*\* $p < 0.001$ , \*\*\* $p < 0.01$ , \*\* $p < 0.05$ , and \* $p < 0.1$  with two-tailed Student t-test. Source data are available in a Source Data file.

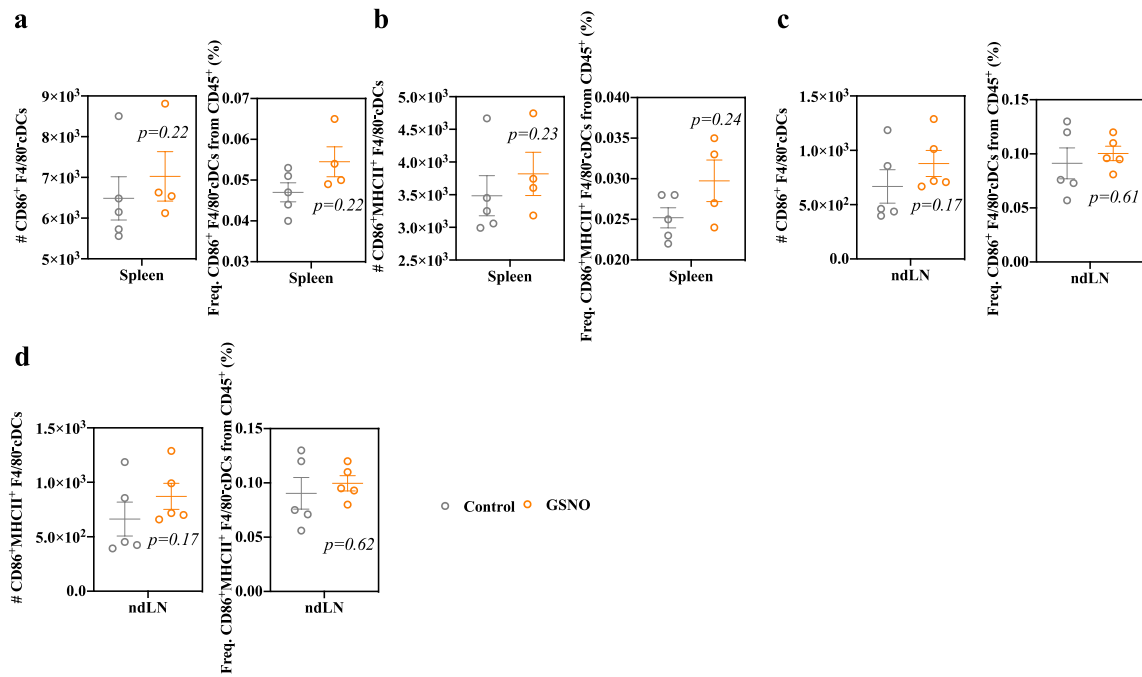

**Supplementary Figure 6. Profiles of activated F4/80<sup>+</sup>cDCs in spleen and ndLN associated with subcutaneous GSNO treatment.** Immune cells in spleen and ndLN were profiled 1 day after treatment of GSNO (570  $\mu\text{g kg}^{-1}$ ) in 30  $\mu\text{L}$  saline. **a-d** Number and percent populations of **(a)** CD86<sup>+</sup> activated F4/80<sup>+</sup>cDCs (CD86<sup>+</sup> F4/80<sup>+</sup>cDCs) in spleen, **(b)** CD86<sup>+</sup> and MHCII<sup>+</sup> activated F4/80<sup>+</sup>cDCs (CD86<sup>+</sup>MHCII<sup>+</sup> F4/80<sup>+</sup>cDCs) in spleen, **(c)** CD86<sup>+</sup> F4/80<sup>+</sup>cDCs in ndLN, and **(d)** CD86<sup>+</sup>MHCII<sup>+</sup> F4/80<sup>+</sup>cDCs in ndLN. Data are presented as individual biological replicates and mean $\pm$ SEM. **a, b** n=5 for control and n=4 for GSNO. **c, d** n=5. \*\*\*\* $p < 0.0001$ , \*\*\* $p < 0.001$ , \*\* $p < 0.01$ , \* $p < 0.05$ , and  $p < 0.1$  with two-tailed Student t-test. Source data are available in a Source Data file.

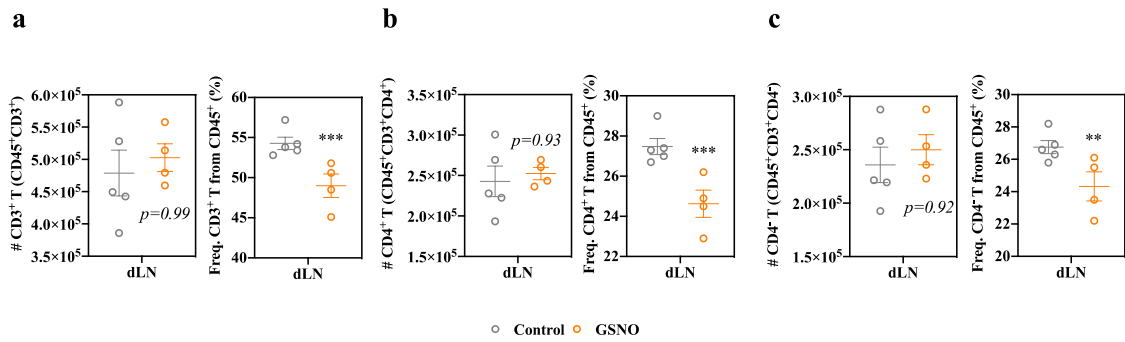

**Supplementary Figure 7. Profiles of CD3<sup>+</sup>, CD4<sup>+</sup>, and CD4<sup>-</sup> T cells in dLN associated with subcutaneous GSNO treatment.** Immune cells in dLN were profiled 1 day after treatment of GSNO (570  $\mu\text{g kg}^{-1}$ ) in 30  $\mu\text{L}$  saline. **a-c** Number and percent populations of (a) CD45<sup>+</sup>CD3<sup>+</sup> (CD3<sup>+</sup> T) (right  $p = 0.0073$ ), (b) CD45<sup>+</sup>CD3<sup>+</sup>CD4<sup>+</sup> (CD4<sup>+</sup> T) (right  $p = 0.0034$ ), and (c) CD45<sup>+</sup>CD3<sup>+</sup>CD4<sup>-</sup> (CD4<sup>-</sup> T) (right  $p = 0.0251$ ) cells. Data are presented as individual biological replicates and mean $\pm$ SEM.  $n=5$  for control and  $n=4$  for GSNO. \*\*\*\* $p < 0.0001$ , \*\*\*\* $p < 0.001$ , \*\*\* $p < 0.01$ , \*\* $p < 0.05$ , and \* $p < 0.1$  with two-tailed Student  $t$ -test. Source data are available in a Source Data file.

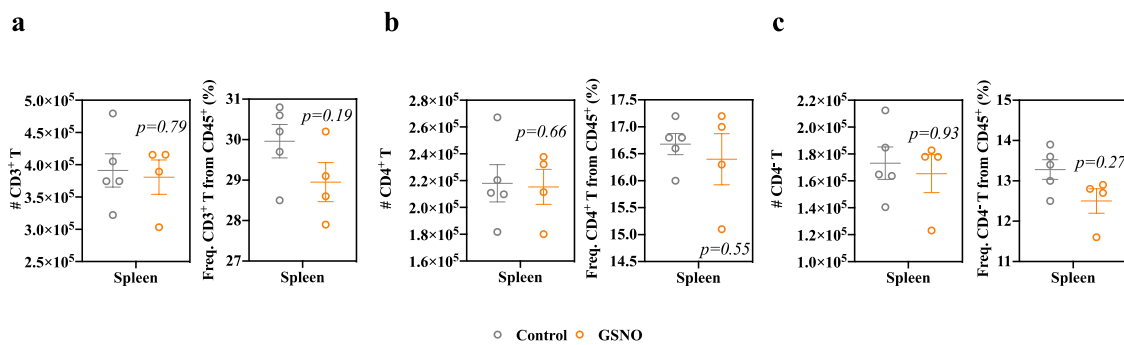

**Supplementary Figure 8. Profiles of CD3<sup>+</sup>, CD4<sup>+</sup>, and CD4<sup>-</sup> T cells in spleen associated with subcutaneous GSNO treatment.** Immune cells in spleen were profiled 1 day after treatment of GSNO (570  $\mu\text{g kg}^{-1}$ ) in 30  $\mu\text{L}$  saline. **a-c** Number and percent populations of (a) CD3<sup>+</sup> T, (b) CD4<sup>+</sup> T, and (c) CD4<sup>-</sup> T cells. Data are presented as individual biological replicates and mean $\pm$ SEM.  $n=5$  for control and  $n=4$  for GSNO. \*\*\*\* $p < 0.0001$ , \*\*\*\* $p < 0.001$ , \*\*\* $p < 0.01$ , \*\* $p < 0.05$ , and \* $p < 0.1$  with two-tailed Student  $t$ -test. Source data are available in a Source Data file.



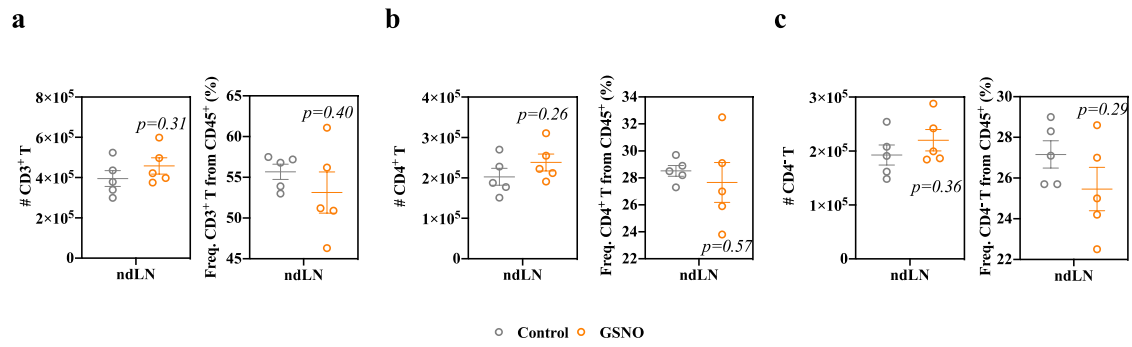

**Supplementary Figure 9. Profiles of CD3<sup>+</sup>, CD4<sup>+</sup>, and CD4<sup>+</sup> T cells in ndLN associated with subcutaneous GSNO treatment.** Immune cells in ndLN were profiled 1 day after treatment of GSNO (570  $\mu\text{g kg}^{-1}$ ) in 30  $\mu\text{L}$  saline. **a-c** Number and percent populations of (a) CD3<sup>+</sup> T, (b) CD4<sup>+</sup> T, and (c) CD4<sup>+</sup> T cells. Data are presented as individual biological replicates and mean $\pm$ SEM. n=5. \*\*\*\* $p < 0.0001$ , \*\*\* $p < 0.001$ , \*\* $p < 0.01$ , \* $p < 0.05$ , and  $p < 0.1$  with two-tailed Student t-test. Source data are available in a Source Data file.

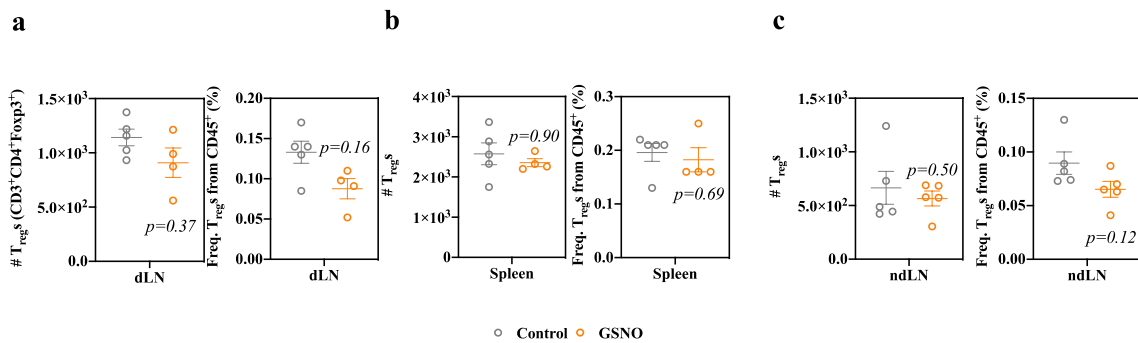

**Supplementary Figure 10. Profiles of T<sub>reg</sub><sup>S</sup> in dLN, spleen, and ndLN when GSNO is subcutaneously treated to tumor-free mice.** Immune cells in dLN, spleen, and ndLN were profiled 1 day after treatment of GSNO (570  $\mu\text{g kg}^{-1}$ ) in 30  $\mu\text{L}$  saline. **a-c** Number and percent populations of CD45<sup>+</sup>CD3<sup>+</sup>CD4<sup>+</sup>Foxp3<sup>+</sup> (T<sub>reg</sub><sup>S</sup>) in (a) dLN, (b) spleen, and (c) ndLN. Data are presented as mean $\pm$ SEM. **a, b** n=5 for control and n=4 for GSNO. **c** n=5. \*\*\*\* $p < 0.0001$ , \*\*\* $p < 0.001$ , \*\* $p < 0.01$ , \* $p < 0.05$ , and  $p < 0.1$  with two-tailed Student t-test. Source data are available in a Source Data file.

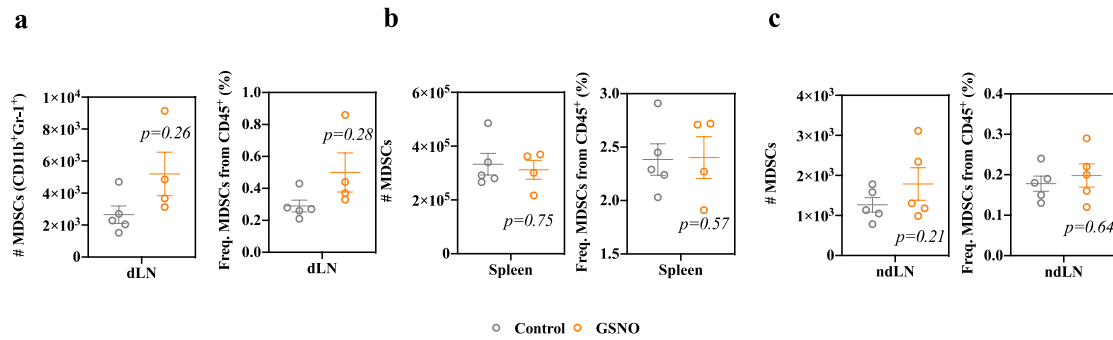

**Supplementary Figure 11. Profiles of MDSCs in dLN, spleen, and ndLN associated with subcutaneous GSNO treatment.** Immune cells in dLN, spleen, and ndLN were profiled 1 day after treatment of GSNO ( $570 \mu\text{g kg}^{-1}$ ) in  $30 \mu\text{L}$  saline. **a-c** Number and percent populations of  $\text{CD45}^+\text{CD11b}^+\text{Gr1}^+$  (MDSCs) in (a) dLN, (b) spleen, and (c) ndLN. Data are presented as individual biological replicates and mean $\pm$ SEM. **a, b**  $n=5$  for control and  $n=4$  for GSNO. **c**  $n=5$ . \*\*\*\*\* $p < 0.0001$ , \*\*\*\* $p < 0.001$ , \*\*\* $p < 0.01$ , \*\* $p < 0.05$ , and \* $p < 0.1$  with two-tailed Student t-test. Source data are available in a Source Data file.

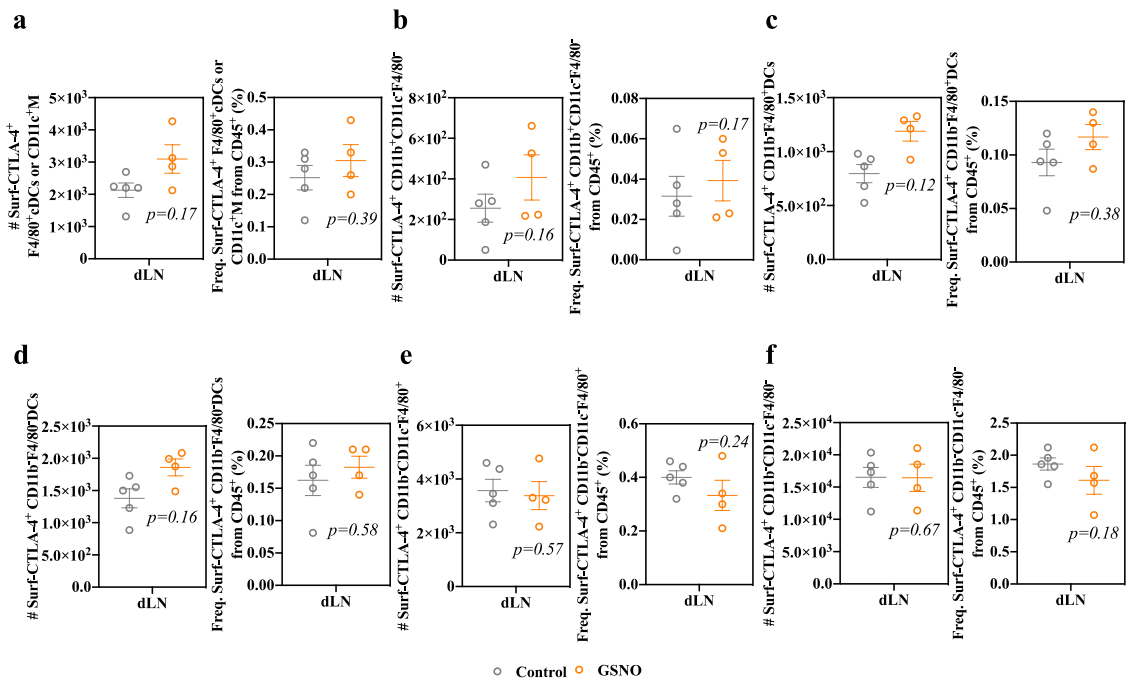

**Supplementary Figure 12. Profiles of extracellular CTLA-4 expression of CD11b, CD11c and/or F4/80 expressing immune cells in dLN associated with subcutaneous GSNO treatment.** Immune cells in dLN were profiled 1 day after treatment of GSNO (570  $\mu\text{g kg}^{-1}$ ) in 30  $\mu\text{L}$  saline. **a-f** Number and percent populations of extracellular CTLA-4 expressing (a) F4/80<sup>+</sup>cDCs or CD11c<sup>+</sup>M (Surf-CTLA-4<sup>+</sup> F4/80<sup>+</sup>cDCs or CD11c<sup>+</sup>M), (b) CD11b<sup>+</sup>CD11c<sup>+</sup>F4/80<sup>-</sup> (Surf-CTLA-4<sup>+</sup> CD11b<sup>+</sup>CD11c<sup>+</sup>F4/80<sup>-</sup>), (c) CD11b<sup>+</sup>F4/80<sup>+</sup>DCs (Surf-CTLA-4<sup>+</sup> CD11b<sup>+</sup>F4/80<sup>+</sup>DCs), (d) CD11b<sup>+</sup>F4/80<sup>+</sup>DCs (Surf-CTLA-4<sup>+</sup> CD11b<sup>+</sup>F4/80<sup>+</sup>DCs), (e) CD11b<sup>+</sup>CD11c<sup>+</sup>F4/80<sup>+</sup> (Surf-CTLA-4<sup>+</sup> CD11b<sup>+</sup>CD11c<sup>+</sup>F4/80<sup>+</sup>), and (f) CD11b<sup>+</sup>CD11c<sup>+</sup>F4/80<sup>-</sup> (Surf-CTLA-4<sup>+</sup> CD11b<sup>+</sup>CD11c<sup>+</sup>F4/80<sup>-</sup>). Data are presented as individual biological replicates and mean $\pm$ SEM. n=5 for control and n=4 for GSNO. \*\*\*\*p < 0.0001, \*\*\*\*p < 0.001, \*\*\*p < 0.01, \*\*p < 0.05, and \*p < 0.1 with two-tailed Student t-test. Source data are available in a Source Data file.

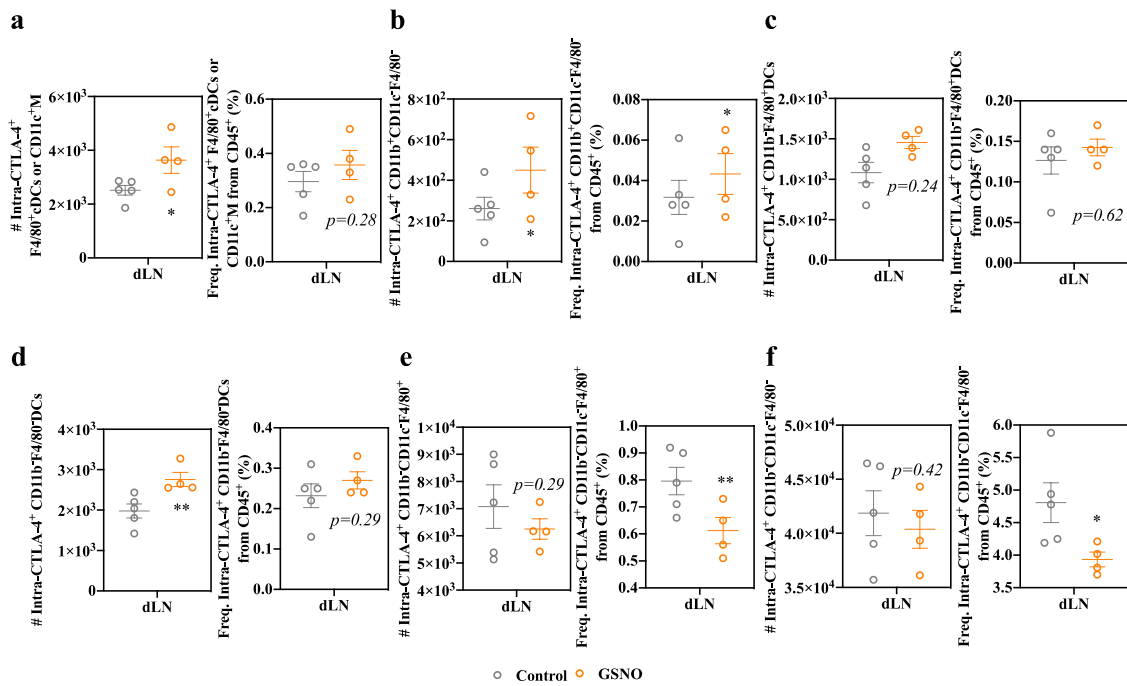

**Supplementary Figure 13. Profiles of intracellular CTLA-4 expression of CD11b, CD11c and/or F4/80 expressing immune cells in dLN associated with subcutaneous GSNO treatment.** Immune cells in dLN were profiled 1 day after treatment of GSNO ( $570 \mu\text{g kg}^{-1}$ ) in  $30 \mu\text{L}$  saline. **a-f** Number and percent populations of intracellular CTLA-4 expressing (a) F4/80<sup>+</sup>cDCs or CD11c<sup>+</sup>M (Intra-CTLA-4<sup>+</sup> F4/80<sup>+</sup>cDCs or CD11c<sup>+</sup>M) (left  $p = 0.0991$ ), (b) CD11b<sup>+</sup>CD11c<sup>+</sup>F4/80<sup>-</sup> (Intra-CTLA-4<sup>+</sup> CD11b<sup>+</sup>CD11c<sup>+</sup>F4/80<sup>-</sup>) (left  $p = 0.0966$  and right  $p = 0.0789$ ), (c) CD11b<sup>+</sup>F4/80<sup>+</sup>DCs (Intra-CTLA-4<sup>+</sup> CD11b<sup>+</sup>F4/80<sup>+</sup>DCs), (d) CD11b<sup>+</sup>F4/80<sup>-</sup>DCs (Intra-CTLA-4<sup>+</sup> CD11b<sup>+</sup>F4/80<sup>-</sup>DCs) (left  $p = 0.0221$ ), (e) CD11b<sup>+</sup>CD11c<sup>+</sup>F4/80<sup>+</sup> (Intra-CTLA-4<sup>+</sup> CD11b<sup>+</sup>CD11c<sup>+</sup>F4/80<sup>+</sup>) (right  $p = 0.0499$ ), and (f) CD11b<sup>+</sup>CD11c<sup>+</sup>F4/80<sup>-</sup> (Intra-CTLA-4<sup>+</sup> CD11b<sup>+</sup>CD11c<sup>+</sup>F4/80<sup>-</sup>) (right  $p = 0.0604$ ). Data are presented as individual biological replicates and mean $\pm$ SEM.  $n=5$  for control and  $n=4$  for GSNO. \*\*\*\*\* $p < 0.0001$ , \*\*\*\* $p < 0.001$ , \*\*\* $p < 0.01$ , \*\* $p < 0.05$ , and \* $p < 0.1$  with two-tailed Student t-test. Source data are available in a Source Data file.

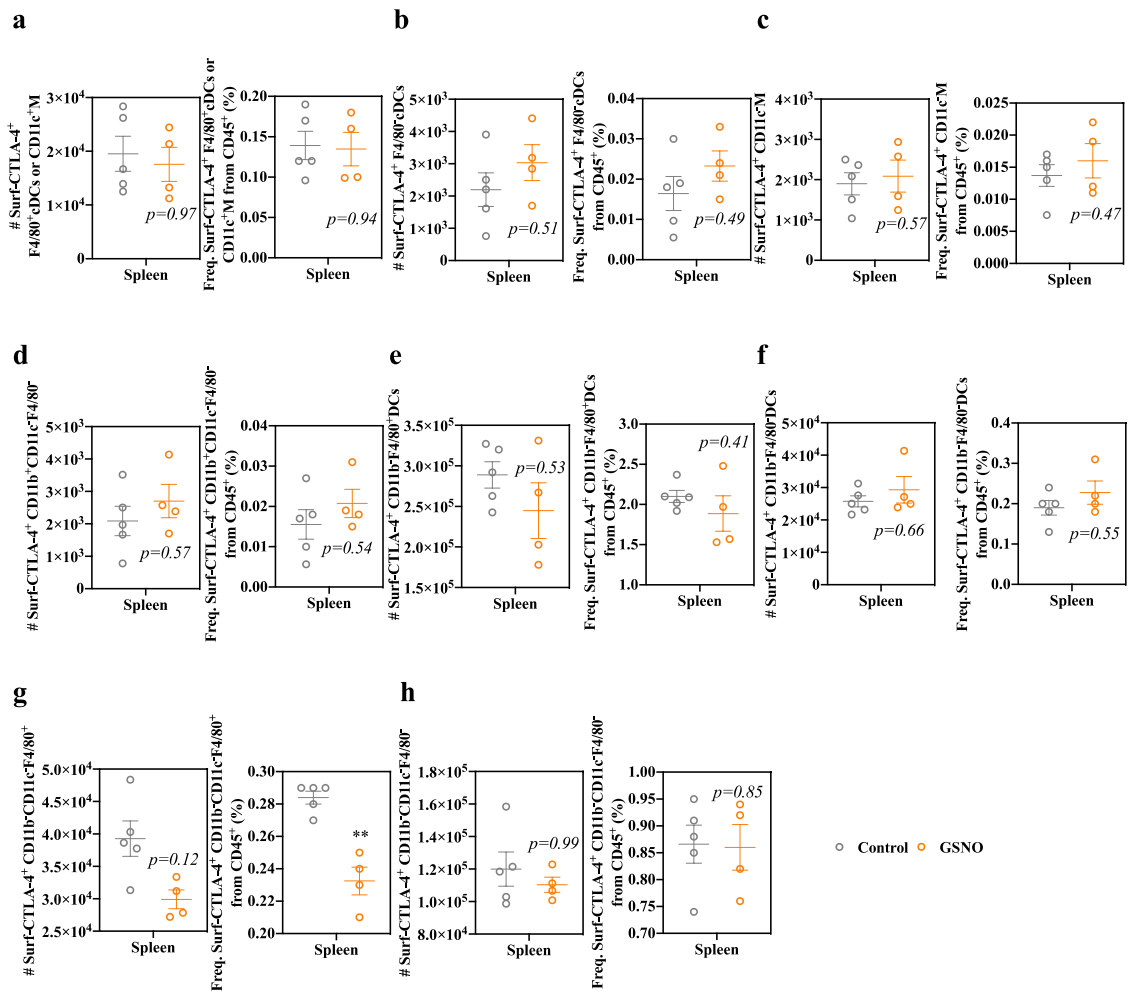

**Supplementary Figure 14. Profiles of extracellular CTLA-4 expression of CD11b, CD11c and/or F4/80 expressing immune cells in spleen associated with subcutaneous GSNO treatment.** Immune cells in spleen were profiled 1 day after treatment of GSNO ( $570 \mu\text{g kg}^{-1}$ ) in  $30 \mu\text{L}$  saline. **a-h** Number and percent populations of extracellular CTLA-4 expressing (a) F4/80<sup>+</sup>cDCs or CD11c<sup>+</sup> macrophages (Surf-CTLA-4<sup>+</sup> F4/80<sup>+</sup>cDCs or CD11c<sup>+</sup>M), (b) F4/80<sup>+</sup>cDCs (Surf-CTLA-4<sup>+</sup> F4/80<sup>+</sup>cDCs), (c) CD11c<sup>+</sup>M (Surf-CTLA-4<sup>+</sup> CD11c<sup>+</sup>M), (d) CD11b<sup>+</sup>CD11c<sup>+</sup>F4/80<sup>-</sup> (Surf-CTLA-4<sup>+</sup> CD11b<sup>+</sup>CD11c<sup>+</sup>F4/80<sup>-</sup>), (e) CD11b<sup>+</sup>F4/80<sup>+</sup>DCs (Surf-CTLA-4<sup>+</sup> CD11b<sup>+</sup>F4/80<sup>+</sup>DCs), (f) CD11b<sup>-</sup>CD11c<sup>+</sup>F4/80<sup>-</sup> (Surf-CTLA-4<sup>+</sup> CD11b<sup>-</sup>F4/80<sup>-</sup>DCs), (g) CD11b<sup>-</sup>CD11c<sup>-</sup>F4/80<sup>+</sup> (Surf-CTLA-4<sup>+</sup> CD11b<sup>-</sup>CD11c<sup>-</sup>F4/80<sup>+</sup>) (right  $p = 0.0190$ ), and (h) CD11b<sup>-</sup>CD11c<sup>+</sup>F4/80<sup>-</sup> (Surf-CTLA-4<sup>+</sup> CD11b<sup>-</sup>CD11c<sup>+</sup>F4/80<sup>-</sup>). Data are presented as individual biological replicates and mean $\pm$ SEM.  $n=5$  for control and  $n=4$  for GSNO. \*\*\*\* $p < 0.0001$ , \*\*\* $p < 0.001$ , \*\* $p < 0.01$ , \* $p < 0.05$ , and  $p < 0.1$  with two-tailed Student t-test. Source data are available in a Source Data file.

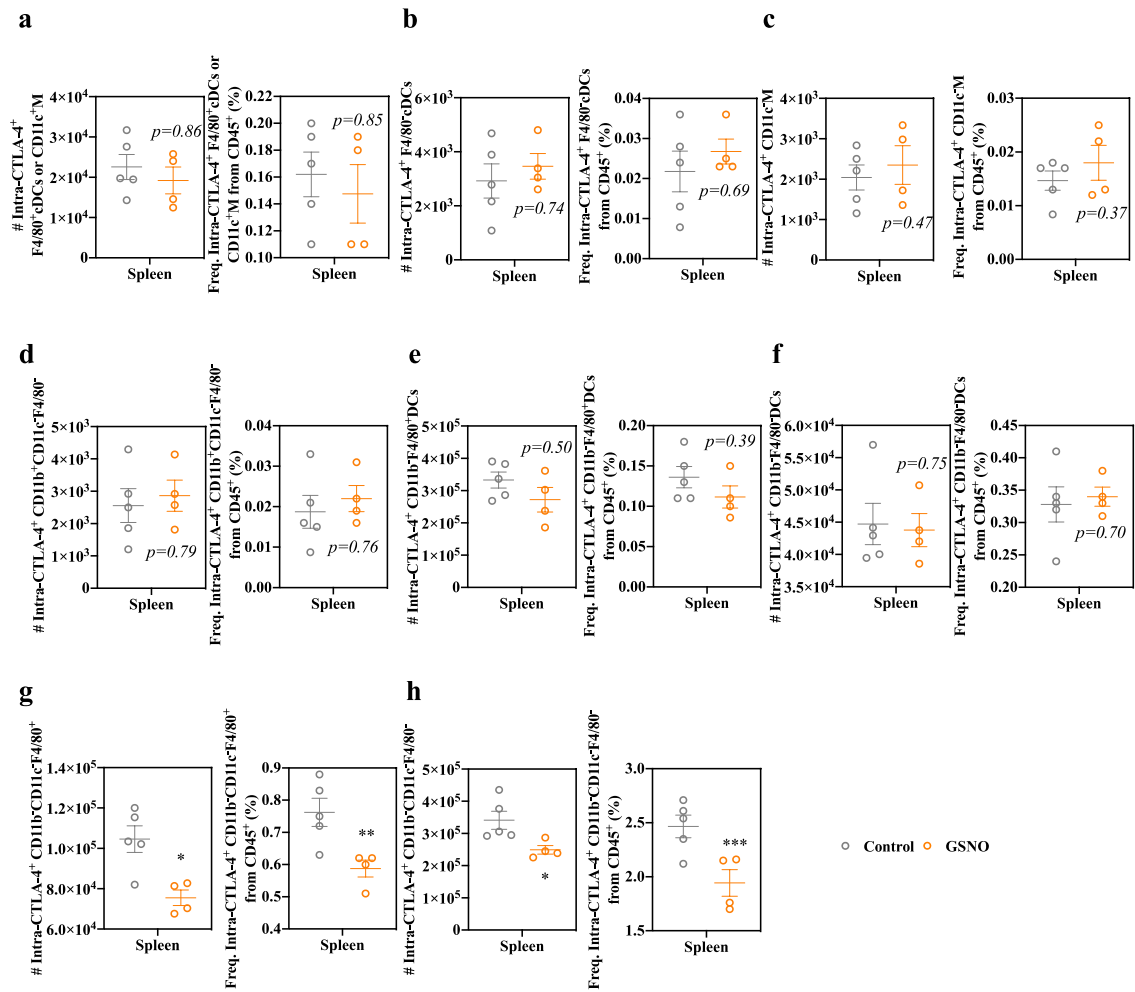

**Supplementary Figure 15. Profiles of intracellular CTLA-4 expression of CD11b, CD11c and/or F4/80 expressing immune cells in spleen associated with subcutaneous GSNO treatment.** Immune cells in spleen were profiled 1 day after treatment of GSNO ( $570 \mu\text{g kg}^{-1}$ ) in  $30 \mu\text{L}$  saline. **a-h** Number and percent populations of **(a)** Intra-CTLA-4<sup>+</sup> F4/80<sup>+</sup>cDCs or CD11c<sup>+</sup>M, **(b)** Intra-CTLA-4<sup>+</sup> F4/80<sup>-</sup>cDCs, **(c)** Intra-CTLA-4<sup>+</sup> CD11c<sup>-</sup>M, **(d)** Intra-CTLA-4<sup>+</sup> CD11b<sup>+</sup>CD11c<sup>-</sup>F4/80<sup>-</sup>, **(e)** Intra-CTLA-4<sup>+</sup> CD11b<sup>-</sup>F4/80<sup>+</sup>DCs, **(f)** Intra-CTLA-4<sup>+</sup> CD11b<sup>-</sup>F4/80<sup>+</sup>DCs, **(g)** Intra-CTLA-4<sup>+</sup> CD11b<sup>+</sup>CD11c<sup>-</sup>F4/80<sup>+</sup> (left  $p = 0.0815$  and right  $p = 0.0391$ ), and **(h)** Intra-CTLA-4<sup>+</sup> CD11b<sup>+</sup>CD11c<sup>-</sup>F4/80<sup>-</sup> (left  $p = 0.0733$  and right  $p = 0.0021$ ). Data are presented as individual biological replicates and mean $\pm$ SEM.  $n=5$  for control and  $n=4$  for GSNO. \*\*\*\* $p < 0.0001$ , \*\*\* $p < 0.001$ , \*\* $p < 0.01$ , \* $p < 0.05$ , and  $p < 0.1$  with two-tailed Student t-test. Source data are available in a Source Data file.

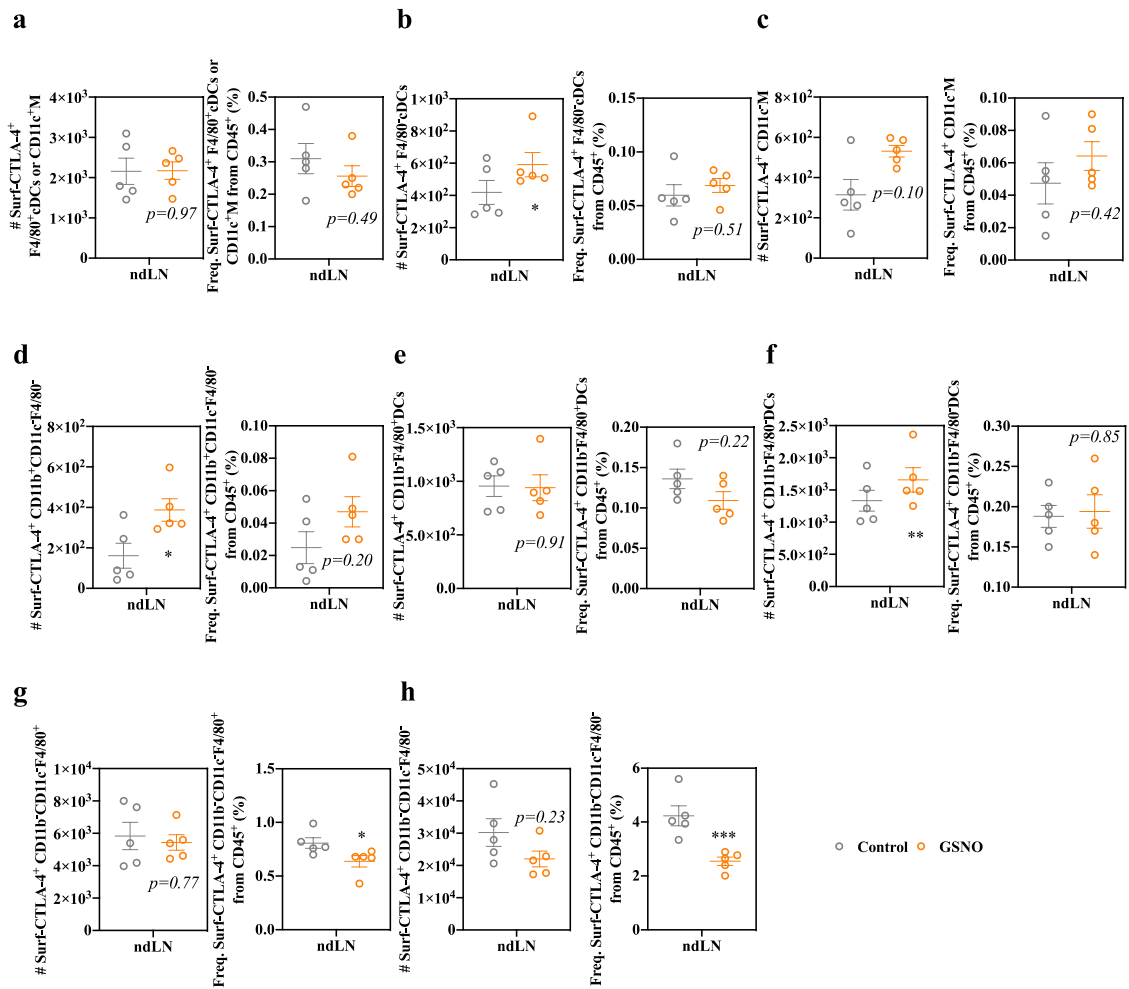

**Supplementary Figure 16. Profiles of extracellular CTLA-4 expression of CD11b, CD11c and/or F4/80 expressing immune cells in ndLN associated with subcutaneous GSNO treatment.** Immune cells in ndLN were profiled 1 day after treatment of GSNO ( $570 \mu\text{g kg}^{-1}$ ) in  $30 \mu\text{L}$  saline. **a-h** Number and percent populations of **(a)** Surf-CTLA-4<sup>+</sup> F4/80<sup>+</sup>cDCs or CD11c<sup>+</sup>M, **(b)** Surf-CTLA-4<sup>+</sup> F4/80<sup>+</sup>cDCs (left  $p = 0.0699$ ), **(c)** Surf-CTLA-4<sup>+</sup> CD11c<sup>+</sup>M, **(d)** Surf-CTLA-4<sup>+</sup> CD11b<sup>+</sup>CD11c<sup>-</sup>F4/80<sup>-</sup> (left  $p = 0.0607$ ), **(e)** Surf-CTLA-4<sup>+</sup> CD11b<sup>-</sup>F4/80<sup>+</sup>DCs, **(f)** Surf-CTLA-4<sup>+</sup> CD11b<sup>-</sup>F4/80<sup>-</sup>DCs (left  $p = 0.0355$ ), **(g)** Surf-CTLA-4<sup>+</sup> CD11b<sup>-</sup>CD11c<sup>-</sup>F4/80<sup>+</sup> (right  $p = 0.0630$ ), and **(h)** Surf-CTLA-4<sup>+</sup> CD11b<sup>-</sup>CD11c<sup>-</sup>F4/80<sup>-</sup> (right  $p = 0.0064$ ). Data are presented as individual biological replicates and mean $\pm$ SEM.  $n=5$ . \*\*\*\*\* $p < 0.0001$ , \*\*\*\* $p < 0.001$ , \*\*\* $p < 0.01$ , \*\* $p < 0.05$ , and \* $p < 0.1$  with two-tailed Student t-test. Source data are available in a Source Data file.

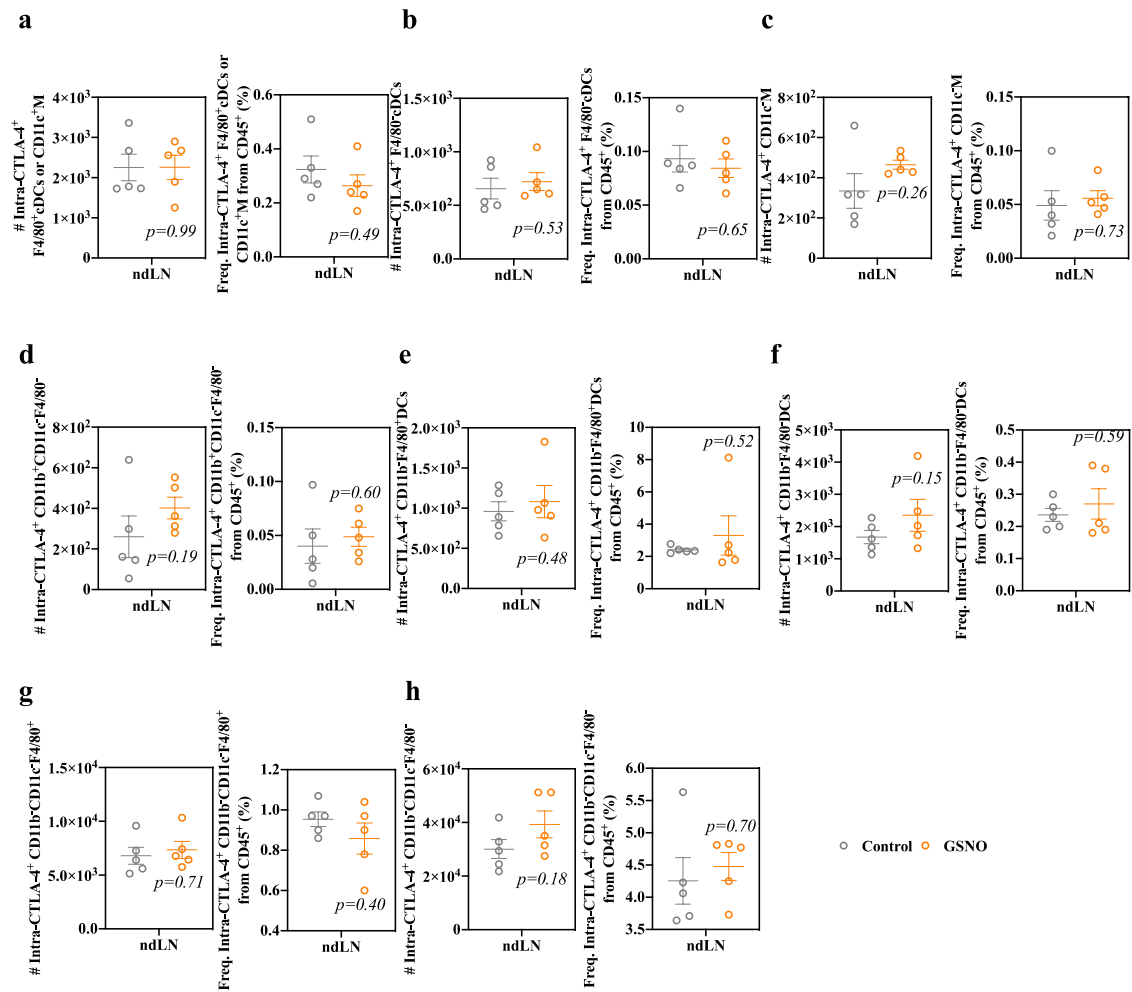

**Supplementary Figure 17. Profiles of intracellular CTLA-4 expression of CD11b, CD11c and/or F4/80 expressing immune cells in ndLN associated with subcutaneous GSNO treatment.** Immune cells in ndLN were profiled 1 day after treatment of GSNO ( $570 \mu\text{g kg}^{-1}$ ) in  $30 \mu\text{L}$  saline. **a-h** Number and percent populations of **(a)** Intra-CTLA-4<sup>+</sup> F4/80<sup>+</sup>cDCs or CD11c<sup>+</sup>M, **(b)** Intra-CTLA-4<sup>+</sup> F4/80<sup>+</sup>cDCs, **(c)** Intra-CTLA-4<sup>+</sup> CD11c<sup>+</sup>M, **(d)** Intra-CTLA-4<sup>+</sup> CD11b<sup>+</sup>CD11c<sup>-</sup>F4/80<sup>-</sup>, **(e)** Intra-CTLA-4<sup>+</sup> CD11b<sup>-</sup>F4/80<sup>+</sup>DCs, **(f)** Intra-CTLA-4<sup>+</sup> CD11b<sup>-</sup>F4/80<sup>+</sup>DCs, **(g)** Intra-CTLA-4<sup>+</sup> CD11b<sup>+</sup>CD11c<sup>-</sup>F4/80<sup>+</sup>, and **(h)** Intra-CTLA-4<sup>+</sup> CD11b<sup>-</sup>CD11c<sup>-</sup>F4/80<sup>-</sup>. Data are presented as individual biological replicates and mean $\pm$ SEM.  $n=5$ . \*\*\*\* $p < 0.0001$ , \*\*\* $p < 0.001$ , \*\* $p < 0.01$ , \* $p < 0.05$ , and  $p < 0.1$  with two-tailed Student t-test. Source data are available in a Source Data file.



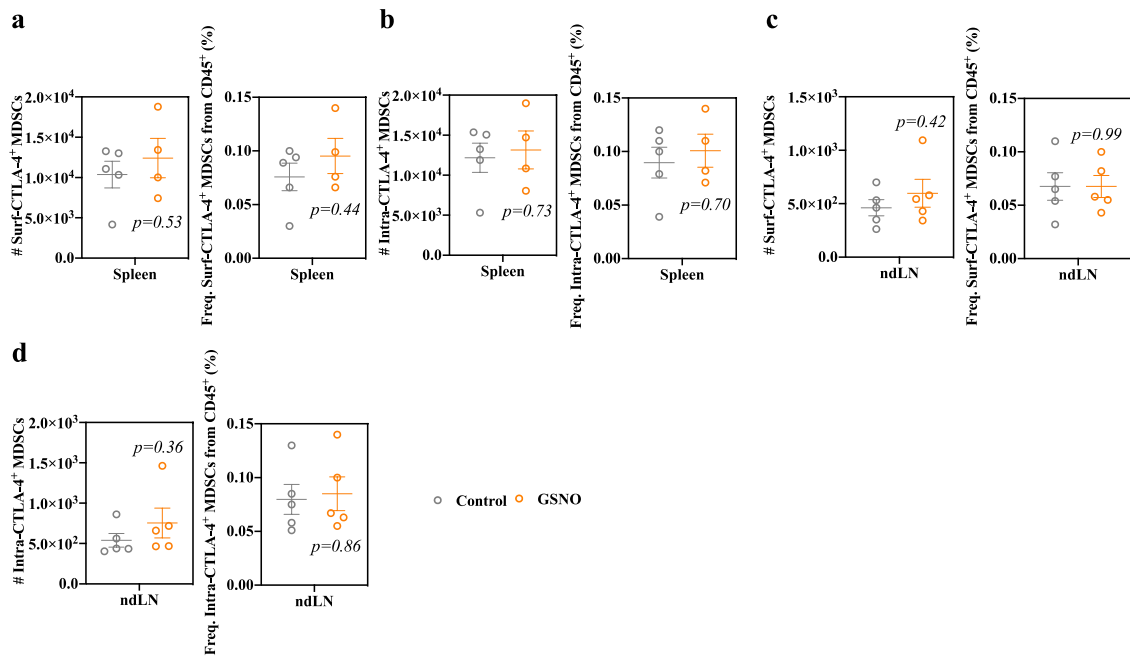

**Supplementary Figure 18. Profiles of extracellular and intracellular CTLA-4 expression of MDSCs in spleen and ndLN associated with subcutaneous GSNO treatment.** Immune cells in spleen and ndLN were profiled 1 day after treatment of GSNO (570  $\mu\text{g kg}^{-1}$ ) in 30  $\mu\text{L}$  saline. **a-d** Number and percent populations of CTLA-4 expressing MDSCs (**a**, **c**) on extracellularly (Surf-CTLA-4<sup>+</sup> T<sub>regs</sub>) or (**b**, **d**) intracellularly (Intra-CTLA-4<sup>+</sup> T<sub>regs</sub>) in (**a**, **b**) spleen and (**c**, **d**) ndLN. Data are presented as individual biological replicates and mean $\pm$ SEM. **a**, **b** n=5 for control and n=4 for GSNO. **c**, **d** n=5. \*\*\*\*\* $p < 0.0001$ , \*\*\*\* $p < 0.001$ , \*\*\* $p < 0.01$ , \*\* $p < 0.05$ , and \* $p < 0.1$  with two-tailed Student t-test. Source data are available in a Source Data file.

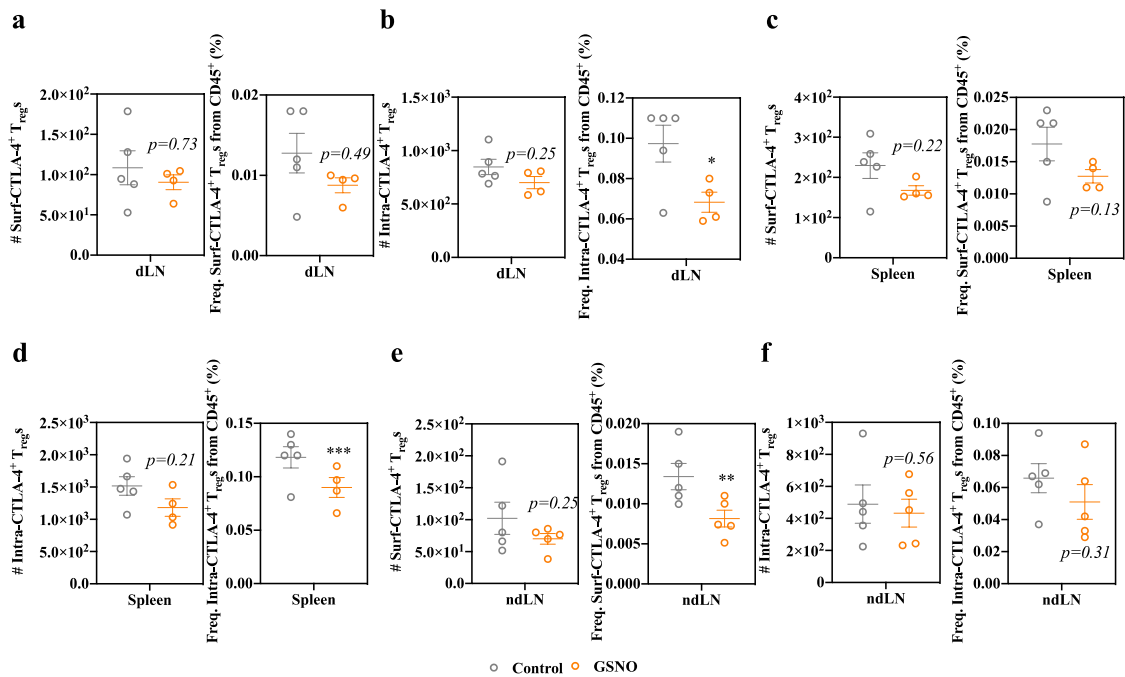

**Supplementary Figure 19. Profiles of extracellular and intracellular CTLA-4 expression of T<sub>reg</sub>s in dLN, spleen, and ndLN associated with subcutaneous GSNO treatment.** Immune cells in dLN, spleen, and ndLN were profiled 1 day after treatment of GSNO (570 μg kg<sup>-1</sup>) in 30 μL saline. **a-f** Number and percent populations of CTLA-4 expressing T<sub>reg</sub>s (**a, c, e**) on extracellularly (Surf-CTLA-4<sup>+</sup> T<sub>reg</sub>s) or (**b, d, f**) intracellularly (Intra-CTLA-4<sup>+</sup> T<sub>reg</sub>s) in (**a, b**) dLN (**b** right  $p = 0.0835$ ), (**c, d**) spleen (**d** right  $p = 0.0076$ ), and (**e, f**) ndLN (**e** right  $p = 0.0363$ ). Data are presented as individual biological replicates and mean ± SEM. **a-d** n=5 for control and n=4 for GSNO. **e, f** n=5. \*\*\*\* $p < 0.0001$ , \*\*\*\* $p < 0.001$ , \*\*\* $p < 0.01$ , \*\* $p < 0.05$ , and \* $p < 0.1$  with two-tailed Student t-test. Source data are available in a Source Data file.

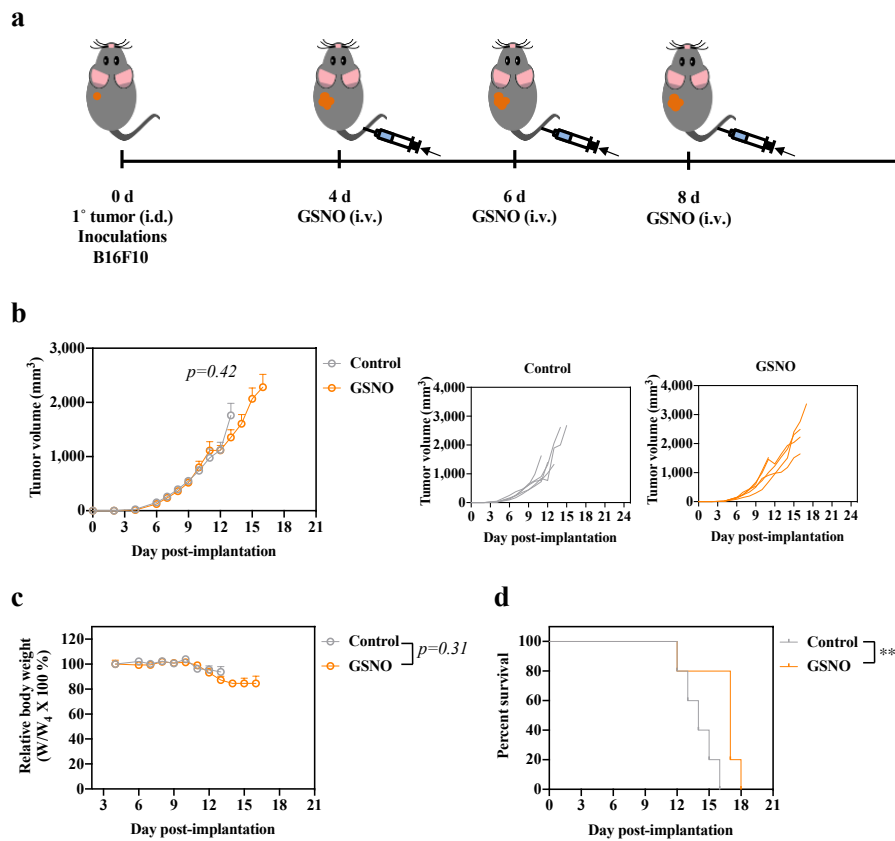

**Supplementary Figure 20. In vivo effects of intravenously administered GSNO on tumor progression.**

**a** Tumor model and treatment schedule. Tumors were formed in C57Bl/6 mice by inoculation of  $10^5$  B16F10-OVA cells in 30  $\mu$ L saline on day 0. GSNO ( $600 \mu\text{g kg}^{-1}$ ) in 30  $\mu$ L saline was administered i.v. on day 4, 6, and 8. **b** Tumor volume. **c** Relative body weight changes poste treatment. **d** Kaplan–Meier survival curves during treatment. Data are presented as individual biological replicates and mean $\pm$ SEM.  $n=5$ . \*\*\*\*\* $p < 0.0001$ , \*\*\*\* $p < 0.001$ , \*\*\* $p < 0.01$ , \*\* $p < 0.05$ , and \* $p < 0.1$ . **b** ANOVA using linear mixed-effects model. **c** Two-way ANOVA using Tukey post-hoc statistical hypothesis. **d** Log-rank using Mantel-Cox statistical hypothesis. Source data are available in a Source Data file.

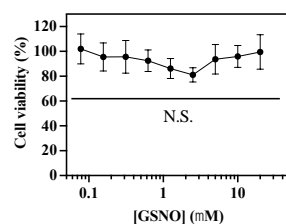

**Supplementary Figure 21. Alamar Blue assay of B16F10-OVA cells treated with GSNO.**  $10^3$  B16F10-OVA cells in 96 well cell culture plate was incubated for 2 days treated with GSNO, followed by recording fluorescence (560 nm excitation, 590 nm emission) with Synergy H4 microplate reader after 1 h incubation with AlamarBlue<sup>TM</sup> cell viability reagent. Data are presented as mean $\pm$ SD.  $n=4$  for 0 and 20  $\mu$ M, and  $n=5$  for the other. \*\*\*\* $p < 0.0001$ , \*\*\* $p < 0.001$ , \*\* $p < 0.01$ , \* $p < 0.05$ , and  $p < 0.1$  with one-way ANOVA using Tukey post-hoc statistical hypothesis by comparing with 0 mg mL<sup>-1</sup>. Source data are available in a Source Data file.

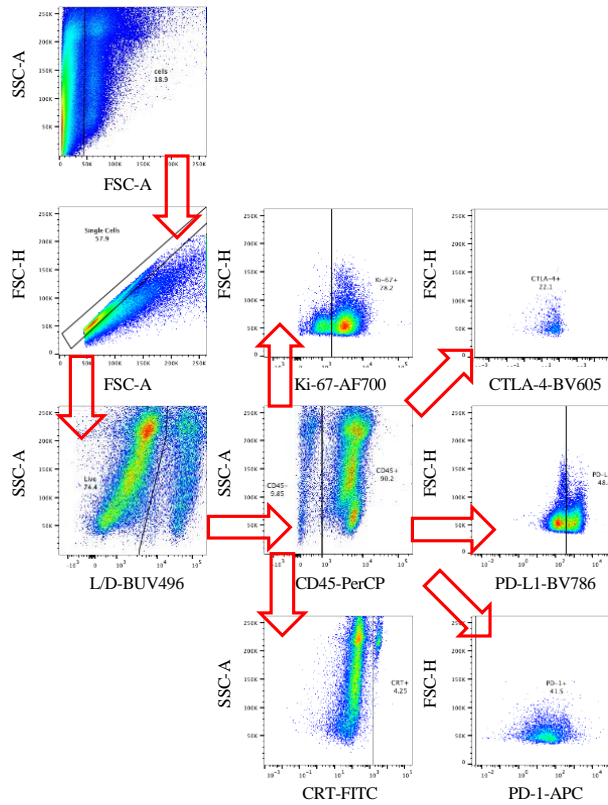

**Supplementary Figure 22. Gating strategy to investigate the immunogenicity of tumor cells from GSNO-treated primary tumors bearing two B16F10-OVA tumors.** 1<sup>o</sup> and 2<sup>o</sup> tumors (10<sup>5</sup> B16F10-OVA cells in 30  $\mu$ L saline) were inoculated on day 0 and day 4, respectively. GSNO (570  $\mu$ g kg<sup>-1</sup>) in 30  $\mu$ L saline was administered on day 7. Tumor cells were profiled 1 day after treatment of GSNO. LSR Fortessa flow cytometry and FlowJo were employed to analyze and profiles the stained cells.

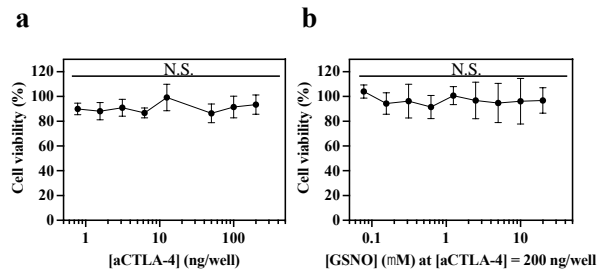

**Supplementary Figure 23. AlamarBlue assessment of B16F0-OVA cell viability in response to in vitro treatment with aCTLA-4 and GSNO+aCTLA-4. a, b**  $10^3$  B16F10-OVA cells in 96 well cell culture plates incubated with (a) aCTLA-4 and (b) GSNO+aCTLA-4 for 2 days, followed by recording fluorescence (560 nm excitation, 590 nm emission) with Synergy H4 microplate reader after 1 h incubation with AlamarBlue™ cell viability reagent. Data are presented as mean±SD. **a**  $n=4$  for 12.5 ng/well, and  $n=5$  for the other. **b**  $n=3$  for 0.08, 1.25 and 5  $\mu\text{M}$ ,  $n=4$  for 0 and 10  $\mu\text{M}$ , and  $n=5$  for the other. \*\*\*\*\* $p < 0.0001$ , \*\*\*\* $p < 0.001$ , \*\*\* $p < 0.01$ , \*\* $p < 0.05$ , and \* $p < 0.1$  with one-way ANOVA using Tukey post-hoc statistical hypothesis by comparing with 0 mg mL<sup>-1</sup>. Source data are available in a Source Data file.

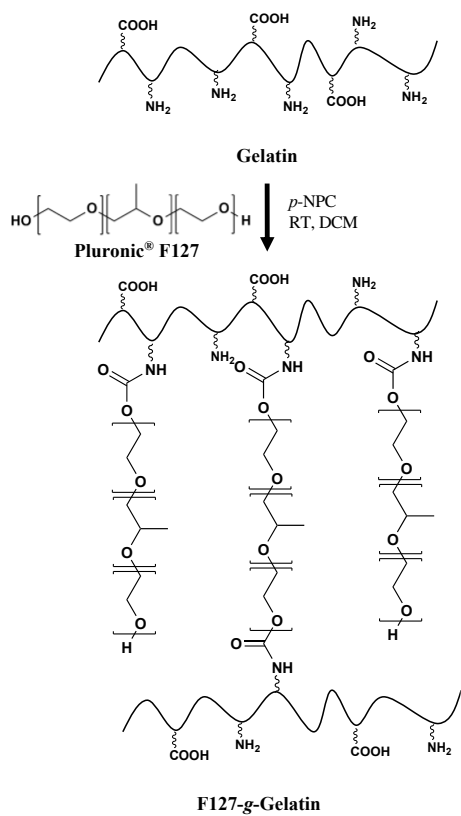

**Supplementary Figure 24. Synthetic scheme of F127-g-Gelatin.** F127 was activated with 4-nitrophenyl chloroformate (*p*-NPC) overnight. *p*-NPC activated F127 yielded via precipitation was reacted with gelatin type A (300g bloom) overnight. F127-g-Gelatin was yielded by dialyzing against deionized water with dialysis tube (MWCO 100 KDa) and freezing drying.

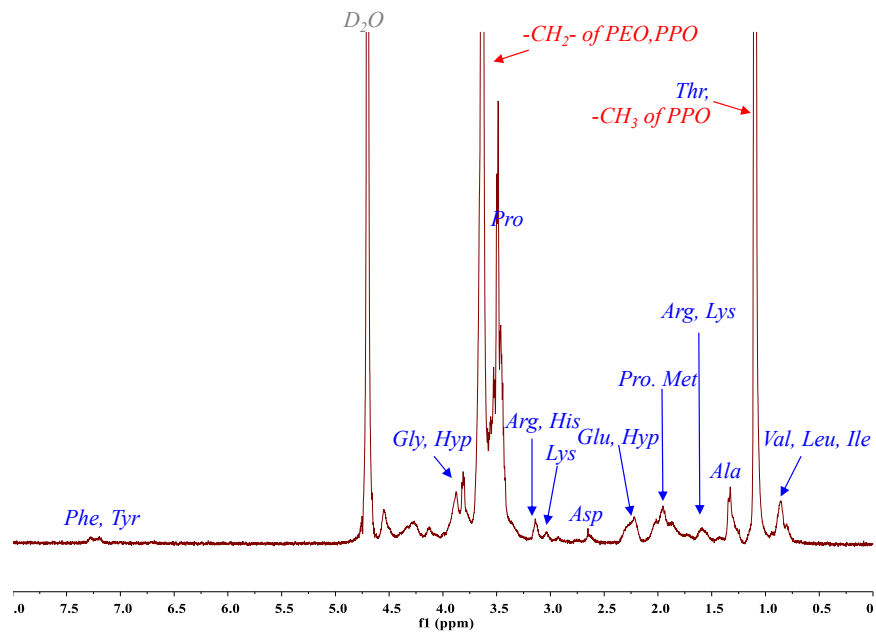

**Supplementary Figure 25.  $^1\text{H}$  NMR of F127-g-Gelatin.** Peaks for F127 and gelatin were marked with red and blue colors, respectively.



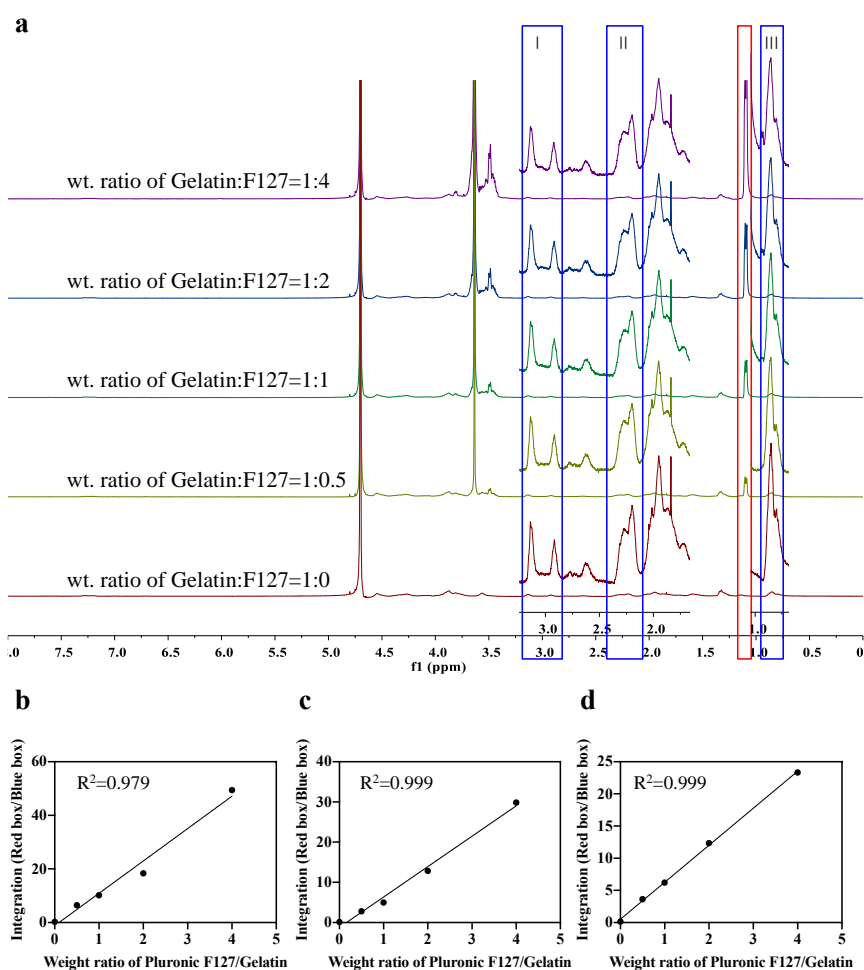

**Supplementary Figure 26. Quantitative  $^1\text{H}$  NMR analysis of F127-g-Gelatin.** **a** Gelatin and F127 were physically mixed at a predetermined weight ratio, and the F127 and gelatin were marked with red and blue colors, respectively. Blue box I represents the Arg and Lys peaks of gelatin. Blue box II represents the Glu and Hyp peaks of gelatin. Blue box III represents the Val, Leu, and Ile peaks of gelatin. Red box represents the methyl groups of polypropylene oxide in F127. **b-d** Integration ratio of Red box to each blue box were plotted with different weight ratio of Gelatin and F127. The composition of F127-g-Gelatin was calculated by using each respective standard curve (**b-d**), and results averaged. As a result, wt. ratio of Gelatin:F127 was confirmed to  $1:1.85 \pm 0.16$ , which was converted percentage ratio to be  $35.1 \text{ wt.}\%:64.9 \pm 1.97 \text{ wt.}\%$ . Source data are available in a Source Data file.

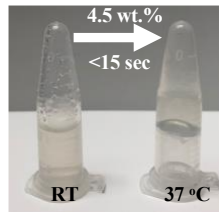

**Supplementary Figure 27. Image of F127-g-Gelatin thermosensitive hydrogel at 4.5 wt.% at RT (left) and 37 °C (right).**

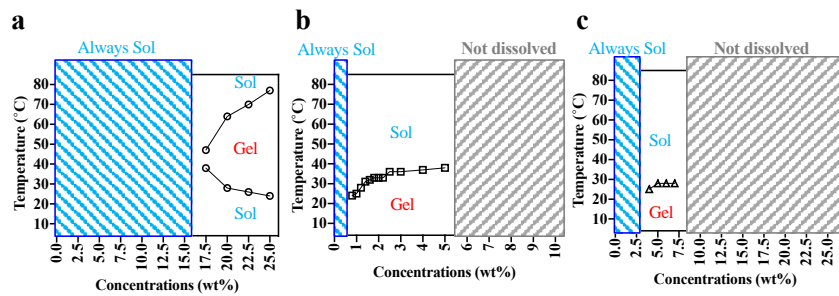

**Supplementary Figure 28. Concentration-dependent sol-gel transition properties of control groups for F127-g-Gelatin. a-c Sol-gel transition graphs of (a) F127, (b) gelatin, and (c) mixture of gelatin and F127 (blend mass ratio for Gelatin:F127=35.1:64.9).**

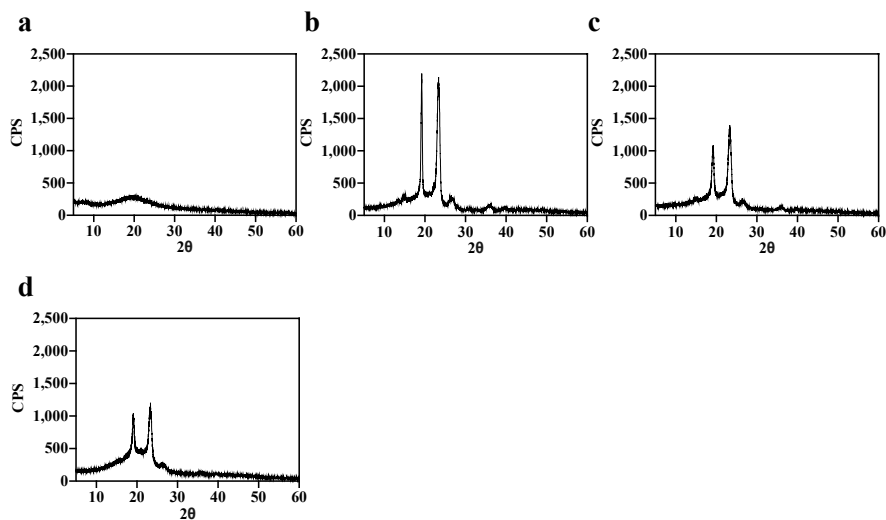

**Supplementary Figure 29. XRD patterns of F127-g-Gelatin to investigate the powder crystallinity. a-d XRD curves of (a) gelatin, (b) F127, (c) mixture of gelatin and F127 (blend mass ratio for Gelatin:F127=35.1:64.9), and (d) F127-g-Gelatin. All polymer samples were prepared by lyophilizing after**

incubation of 4 wt.% polymer solutions at 37 °C for 1 h and ultra-rapidly freezing using liquid nitrogen.

Source data are available in a Source Data file.

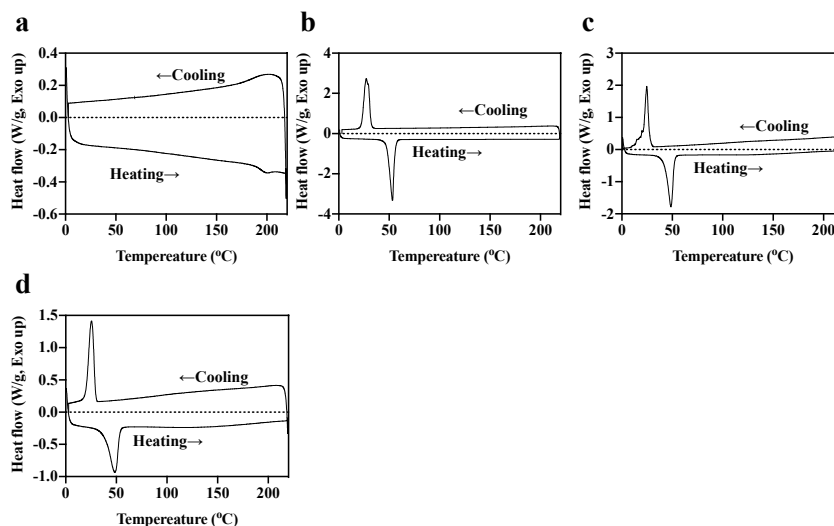

**Supplementary Figure 30. Powder DSC thermograms of F127-g-Gelatin to investigate the powder crystallinity.** a-d DSC curves of (a) gelatin ( $T_c$ =N.D., and  $T_m$ =N.D.), (b) F127 ( $T_c$ =27.2 °C, and  $T_m$ =53.3 °C), (c) mixture of Gelatin and F127 (blend mass ratio for Gelatin:F127=35.1:64.9) ( $T_c$ =24.7 °C, and  $T_m$ =48.6 °C), and (d) F127-g-Gelatin ( $T_c$ =25.5 °C, and  $T_m$ =48.7 °C). All polymer samples were prepared by lyophilizing after incubation of 4 wt.% polymer solutions at 37 °C for 1 h and ultra-rapid freezing using liquid nitrogen.  $T_c$  and  $T_m$  represents the crystalline temperature and melting temperature, respectively. N.D. means "not determined". Source data are available in a Source Data file.

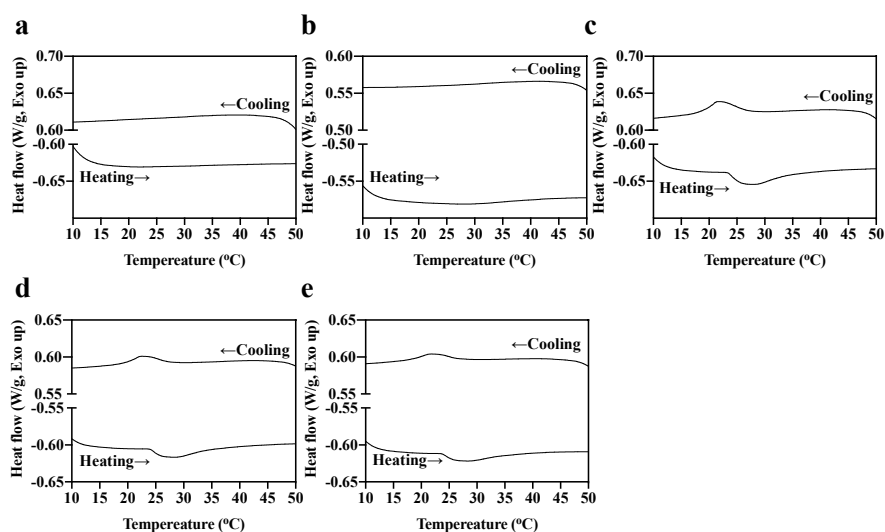

**Supplementary Figure 31. Solution DSC thermograms of F127-g-Gelatin.** a-e DSC curves of solutions containing (a) deionized water, (b) gelatin (4 wt.%), (c) F127 (4 wt.%), (d) mixture of gelatin and F127 (Final 4 wt.%, blend mass ratio for Gelatin:F127=35.1:64.9), and (e) F127-g-Gelatin (4 wt.%). Source data are available in a Source Data file.

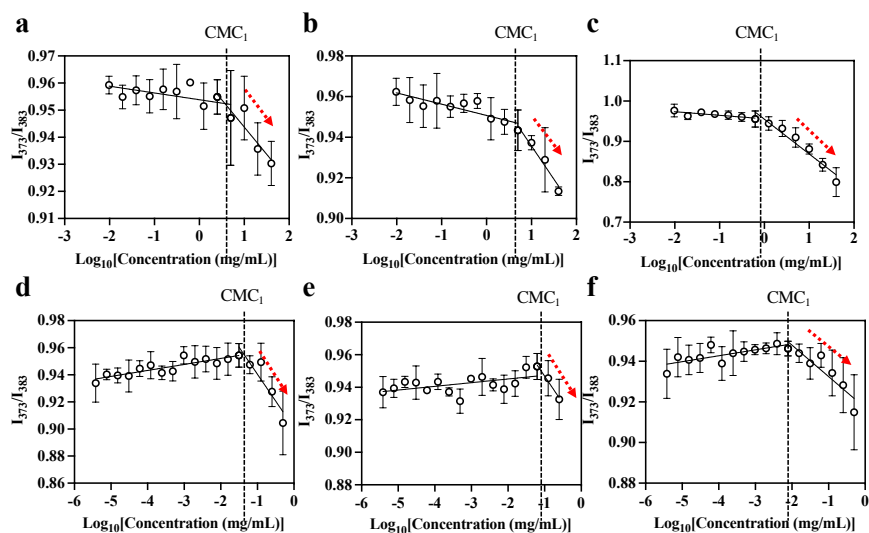

**Supplementary Figure 32. CMC measurement of F127-g-Gelatin with typical pyrene method.** a-f Polymer concentration-dependent ratiometric emitted fluorescence (373 nm and 383 nm) of pyrenes at an excitation wavelength of 336 nm was recorded. The intersection of two distinctive linear lines represents  $CMC_1$ . a-f Data represent measured  $CMC_1$  of (a) F127 at room temperature (RT), (b) mixture of gelatin and F127 (blend mass ratio for Gelatin:F127=35.1:64.9) at RT, (c) F127-g-Gelatin at RT, (d) F127 at 37 °C, (e) F127-g-Gelatin at 37 °C, (f) F127-g-Gelatin at 37 °C.

mixture of gelatin and F127 (blend mass ratio for Gelatin:F127=35.1:64.9) at 37 °C, and (f) F127-g-Gelatin at 37 °C. Gelatin does not show any distinctive intersections. Data are presented as mean±SD. n=3 except (d) n=5. Source data are available in a Source Data file.

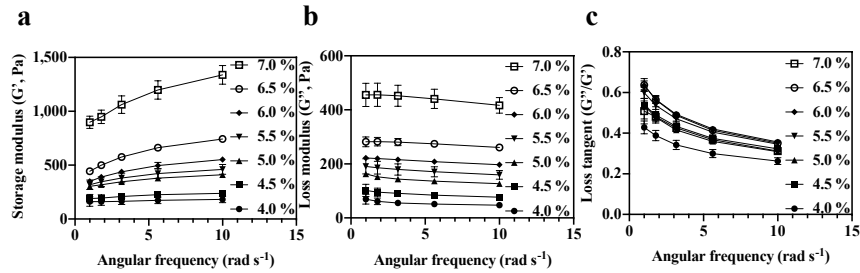

**Supplementary Figure 33. Rheology of F127-g-Gelatin at different concentrations at 37 °C. a-c** (a) Storage modulus ( $G'$ ), (b) loss modulus ( $G''$ ), and (c) loss tangent ( $G''/G'$ ) of F127-g-Gelatin at 4.0-7.0 wt.%. Data are presented as mean±SD. n=3 for 4.5 wt.%, n=4 for 5.5, 6.0, 6.5, and 7.0 wt.%, and n=5 for 4.0 and 5.0 wt.%. Source data are available in a Source Data file.

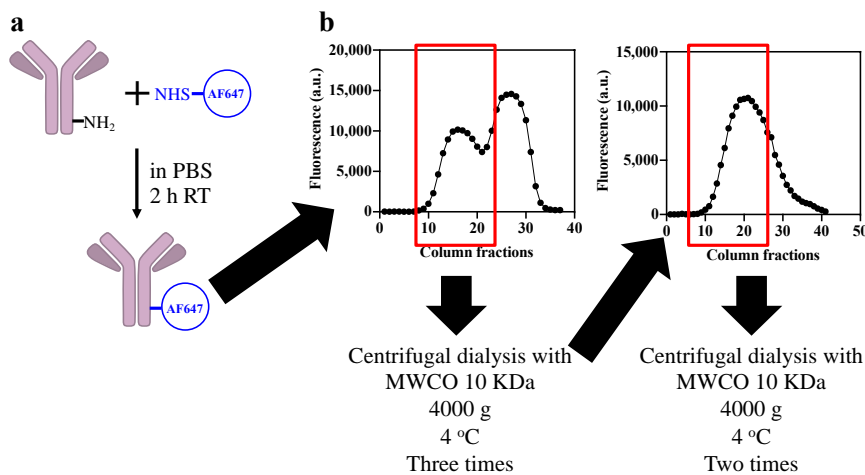

**Supplementary Figure 34. Synthesis and preparation of Alexa Fluor™ 647 labeled aCTLA-4. a-b** (a) aCTLA-4 in PBS was reacted with Alexa Fluor™ 647 NHS Ester (AF647-NHS) in DMSO at room temperature, (b) followed by purification with CL-6B Sepharose® column and spin filter with Amicon® Ultra centrifugal filter (Milipore, MWCO 10 kDa). Source data are available in a Source Data file.

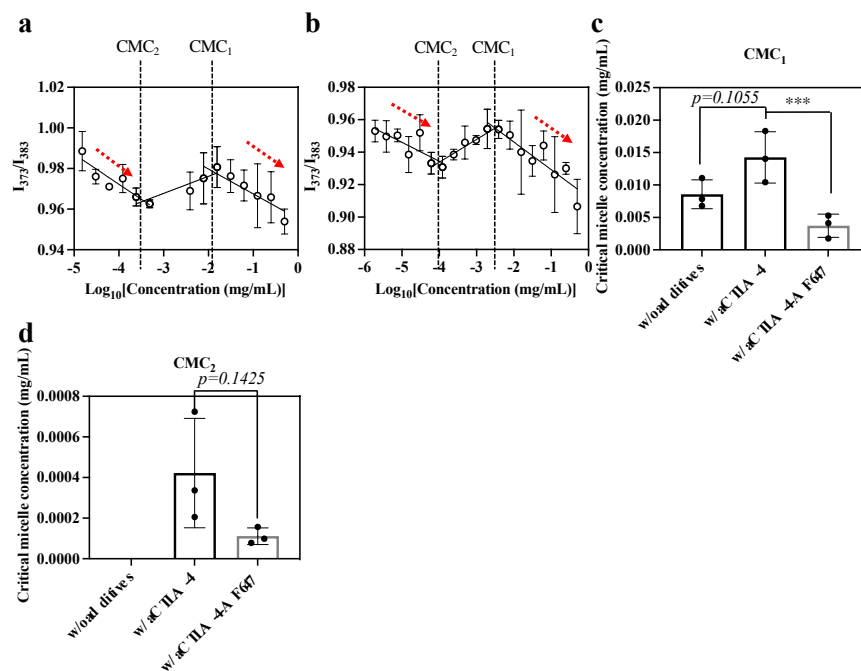

**Supplementary Figure 35. CMC measurement of F127-g-Gelatin containing aCTLA-4 and aCTLA-AF647 with typical pyrene method.** **a, b** Polymer concentration-dependent ratiometric emitted fluorescence (373 nm and 383 nm) of pyrenes at excitation wavelength of 336 nm was recorded with or without aCTLA-4 or aCTLA-4AF647. The intersections of two distinctive linear lines represent CMC<sub>1</sub> and CMC<sub>2</sub>. CMC<sub>1</sub> and CMC<sub>2</sub> of **(a)** F127-g-Gelatin containing aCTLA at 37 °C, and **(b)** F127-g-Gelatin containing aCTLA-AF647 at 37 °C. **c, d** Quantitative and statistical analysis of **(c)** CMC<sub>1</sub> ( $p = 0.1687$  for w/o additives vs. w/ aCTLA-4-AF647, and  $p = 0.0090$  for w/ aCTLA-4 vs. w/ aCTLA-4-AF647) and **(d)** CMC<sub>2</sub> of F127-g-Gelatin containing aCTLA-4 and aCTLA-AF647 at 37 °C. Data are presented as mean±SD.  $n=3$ . \*\*\*\*\* $p < 0.0001$ , \*\*\*\* $p < 0.001$ , \*\*\* $p < 0.01$ , \*\* $p < 0.05$ , and \* $p < 0.1$ . **c** One-way ANOVA using Tukey post-hoc statistical hypothesis. **d** Two-tailed Student t-test. Source data are available in a Source Data file.

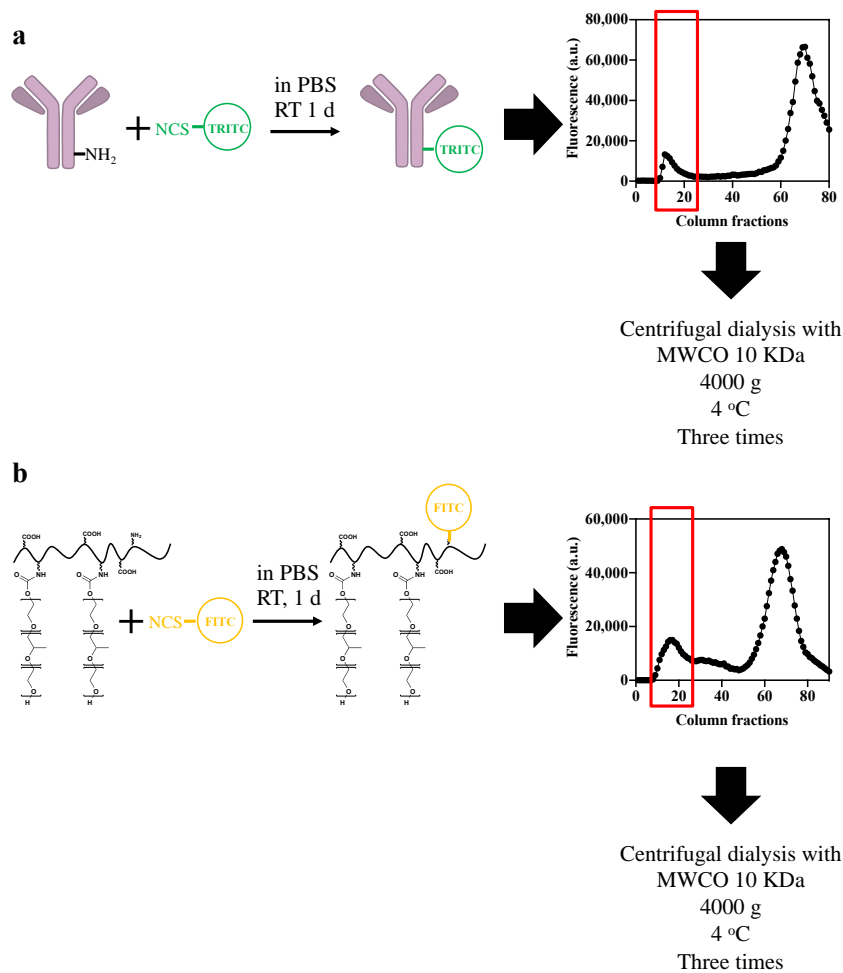

**Supplementary Figure 36. Synthesis and preparation of TRITC labeled aCTLA-4 and FITC labeled F127-g-Gelatin.** **a** aCTLA-4 in PBS was reacted with TRITC in DMSO at room temperature, followed by purification with CL-6B Sepharose<sup>®</sup> column and spin filter with Amicon<sup>®</sup> Ultra centrifugal filter (Milipore, MWCO 10 kDa). **b** F127-g-Gelatin in PBS was reacted with FITC in DMSO at room temperature, followed by purification with CL-6B Sepharose<sup>®</sup> column and spin filter with Amicon<sup>®</sup> Ultra centrifugal filter (Milipore, MWCO 10 kDa). Source data are available in a Source Data file.

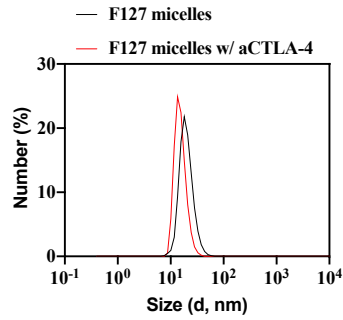

**Supplementary Figure 37. Size distribution of F127 micelles with and without aCTLA-4 (n=12).** Final concentrations of F127 and aCTLA-4 concentrations are 0.9 wt.% and 0.542 mg mL<sup>-1</sup>, respectively, which are equivalent to the concentrations of F127-g-Gelatin and aCTLA-4 in Figure 4H. n=12. Source data are available in a Source Data file.

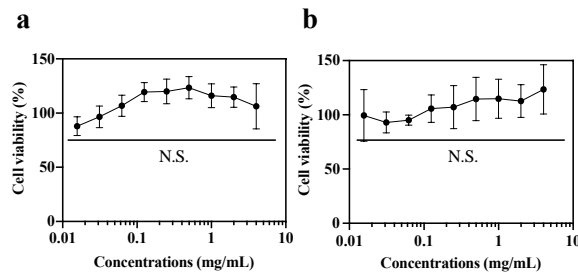

**Supplementary Figure 38. AlamarBlue assay of NIH3T3 and B16F10-OVA treated with F127-g-Gelatin.** **a, b** 10<sup>4</sup> (a) NIH3T3 or (b) B16F10-OVA cells in 96 well cell culture plate were each treated with F127-g-Gelatin for 2 days, followed by recording fluorescence (560 nm excitation, 590 nm emission) with Synergy H4 microplate reader after 1 h incubation with AlamarBlue<sup>TM</sup> cell viability reagent. Data are presented as mean±SD. **a** n=8. **b** n=4. \*\*\*\*\**p* < 0.0001, \*\*\*\**p* < 0.001, \*\*\**p* < 0.01, \*\**p* < 0.05, and \**p* < 0.1 with one-way ANOVA using Tukey post-hoc statistical hypothesis by comparing it with 0 mg mL<sup>-1</sup>. Source data are available in a Source Data file.



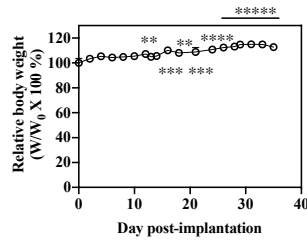

**Supplementary Figure 39. Relative body weight changes after treatment of bare hydrogel.** Relative body weight was measured after one-time subcutaneous administration of bare F127-g-Gelatin hydrogel on tumor-free mice. Data are presented as mean±SEM. n=5. \*\*\*\*p < 0.0001, \*\*\*p < 0.001, \*\*p < 0.01, \*p < 0.05, and \*p < 0.1 with one-way ANOVA using Tukey post-hoc statistical hypothesis by comparing it with day 0 (p = 0.0468 for day 12, p = 0.0011 for day 16, p = 0.0187 for day 18, p = 0.0070 for day 21, p = 0.0005 for day 24, and p < 0.0001 for day 26, 28, 29, 31, 33, and 35). Source data are available in a Source Data file.

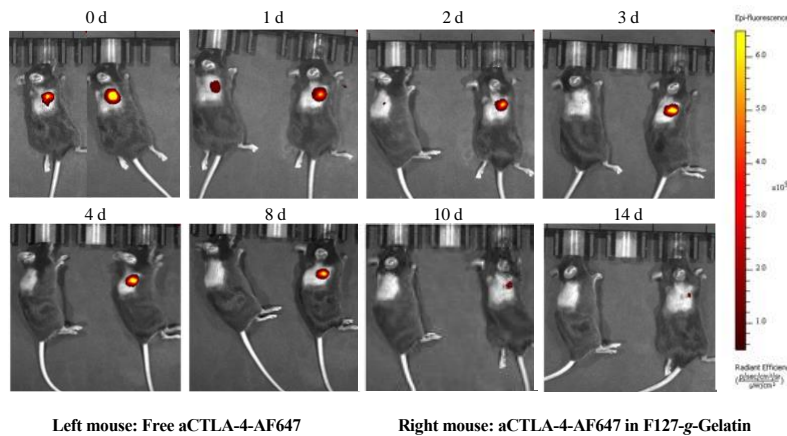

**Supplementary Figure 40. IVIS® images of mice treated with Alexa Fluor™ 647 labeled aCTLA-4 by bolus delivery or with F127-g-Gelatin.** Representative time-resolved IVIS® images of aCTLA-4-AF647 fluorescence were used to quantify the amounts of aCTLA-4 not diffused from the injection sites. Their inversed values represent the amounts of aCTLA-4 released from the injection site as an injected bolus or F127-g-Gelatin hydrogel. The quantified fluorescence values are reported in Figure 4n.

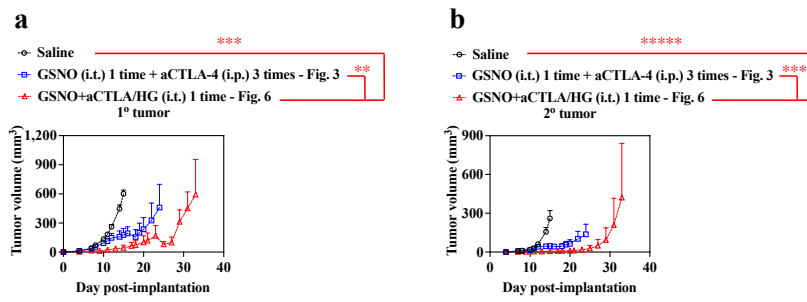

**Supplementary Figure 41. Comparison of GSNO+aCTLA-4/HG (i.t., 1 time) in Fig. 6 and GSNO (i.t., 1 time)+aCTLA-4 (i.p., 3 times) in Figure 3. a** 1° (directly injected) tumor size. **b** 2° (uninjected) tumor size. Data are presented as mean±SEM. n=5. \*\*\*\* $p < 0.0001$ , \*\*\* $p < 0.001$ , \*\* $p < 0.01$ , \* $p < 0.05$ , and  $p < 0.1$  with ANOVA using linear mixed-effects model. Source data are available in a Source Data file.

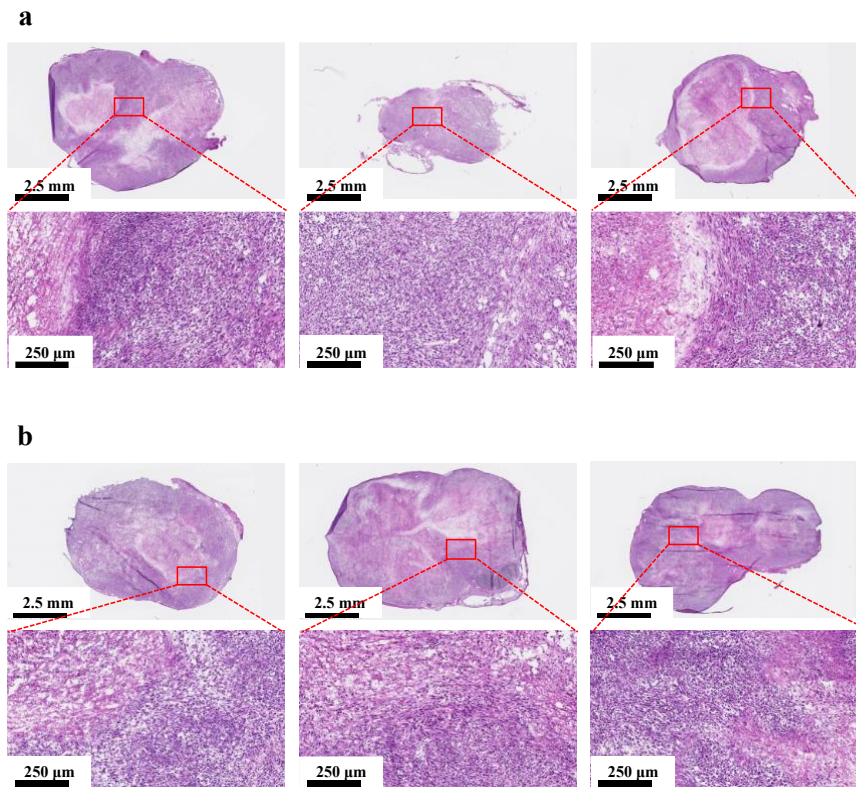

**Supplementary Figure 42. Representative histological H&E images of 4T1 tumor tissues treated with F127-g-Gelatin hydrogels. a, b** 1<sup>o</sup> and 2<sup>o</sup> tumors were formed in Balb/C mice by inoculation of  $3 \times 10^5$  4T1 cells in 30  $\mu$ L saline to the left mammary fatpad on day 0 and right mammary fatpad on day 4, respectively. 30  $\mu$ L of (a) saline and (b) 4.5 wt.% F127-g-Gelatin hydrogel were administered intratumorally on day 7. 1<sup>o</sup> tumor tissues were dissected, frozen with OCT, and stained with H&E after sacrificing mice on day 14 (n=3).

**Supplementary Table 1. Statistical comparison for Fig. 3b, c with ANOVA using linear mixed-effects model.**

| vs.                              | <i>P</i> value |          |
|----------------------------------|----------------|----------|
|                                  | 1° tumor       | 2° tumor |
| Control vs. Control+aCTLA-4      | 0.8650         | 0.9990   |
| Control vs. GSNO                 | 0.9410         | 0.8561   |
| Control vs. GSNO+aCTLA-4         | 0.0032         | <0.0001  |
| Control+aCTLA-4 vs. GSNO         | 0.6135         | 0.8394   |
| Control+aCTLA-4 vs. GSNO+aCTLA-4 | 0.0536         | 0.0001   |
| GSNO vs. GSNO+aCTLA-4            | 0.0015         | 0.0116   |

**Supplementary Table 2. Statistical comparison for Fig. 3e with Log-rank analysis with Mantel-Cox statistical hypothesis and Fig. 3f-i with one-way ANOVA using Tukey post-hoc statistical hypothesis.**

| Figures                                                | vs.                              | <i>P</i> value |
|--------------------------------------------------------|----------------------------------|----------------|
| <b>e</b>                                               | Control vs. Control+aCTLA-4      | 0.5509         |
|                                                        | Control vs. GSNO                 | 0.4013         |
|                                                        | Control vs. GSNO+aCTLA-4         | 0.1189         |
|                                                        | Control+aCTLA-4 vs. GSNO         | 0.1290         |
|                                                        | Control+aCTLA-4 vs. GSNO+aCTLA-4 | 0.1276         |
|                                                        | GSNO vs. GSNO+aCTLA-4            | 0.0939         |
| <b>f</b><br><b>CD45<sup>+</sup></b>                    | Control vs. Control+aCTLA-4      | >0.9999        |
|                                                        | Control vs. GSNO                 | 0.9988         |
|                                                        | Control vs. GSNO+aCTLA-4         | 0.0214         |
|                                                        | Control+aCTLA-4 vs. GSNO         | 0.9992         |
|                                                        | Control+aCTLA-4 vs. GSNO+aCTLA-4 | 0.0221         |
|                                                        | GSNO vs. GSNO+aCTLA-4            | 0.0409         |
| <b>g</b><br><b>CD4<sup>+</sup> T</b>                   | Control vs. Control+aCTLA-4      | 0.9997         |
|                                                        | Control vs. GSNO                 | >0.9999        |
|                                                        | Control vs. GSNO+aCTLA-4         | 0.1518         |
|                                                        | Control+aCTLA-4 vs. GSNO         | 0.9988         |
|                                                        | Control+aCTLA-4 vs. GSNO+aCTLA-4 | 0.1772         |
|                                                        | GSNO vs. GSNO+aCTLA-4            | 0.1706         |
| <b>g</b><br><b>LAG-3<sup>+</sup> CD4<sup>+</sup> T</b> | Control vs. Control+aCTLA-4      | 0.9997         |
|                                                        | Control vs. GSNO                 | 0.9997         |

|                                                        |                                      |         |
|--------------------------------------------------------|--------------------------------------|---------|
|                                                        | Control vs. GSNO+aCTLA-4             | 0.0169  |
|                                                        | Control+aCTLA-4 vs. GSNO             | 0.9980  |
|                                                        | Control+aCTLA-4 vs. GSNO+aCTLA-4     | 0.0142  |
|                                                        | GSNO vs. GSNO+aCTLA-4                | 0.0295  |
| <b>g</b><br><b>PD-1<sup>+</sup> CD4<sup>+</sup> T</b>  | Control vs. Control+aCTLA-4          | 0.9980  |
|                                                        | Control vs. GSNO                     | 0.9996  |
|                                                        | Control vs. GSNO+aCTLA-4             | 0.0725  |
|                                                        | Control+aCTLA-4 vs. GSNO             | 0.9930  |
|                                                        | Control+aCTLA-4 vs. GSNO+aCTLA-4     | 0.0995  |
|                                                        | GSNO vs. GSNO+aCTLA-4                | 0.0797  |
| <b>g</b><br><b>T<sub>reg</sub></b>                     | Free aCTLA-4 vs. aCTLA-4 micelle     | 0.9980  |
|                                                        | Free aCTLA-4 vs. aCTLA-4 hydrogel    | 0.9914  |
|                                                        | aCTLA-4 micelle vs. aCTLA-4 hydrogel | 0.2146  |
|                                                        | Free aCTLA-4 vs. aCTLA-4 micelle     | 0.9993  |
|                                                        | Free aCTLA-4 vs. aCTLA-4 hydrogel    | 0.2803  |
|                                                        | aCTLA-4 micelle vs. aCTLA-4 hydrogel | 0.3852  |
| <b>h</b><br><b>CD8<sup>+</sup> T</b>                   | Free aCTLA-4 vs. aCTLA-4 micelle     | 0.9934  |
|                                                        | Free aCTLA-4 vs. aCTLA-4 hydrogel    | >0.9999 |
|                                                        | aCTLA-4 micelle vs. aCTLA-4 hydrogel | 0.0593  |
|                                                        | Free aCTLA-4 vs. aCTLA-4 micelle     | 0.9945  |
|                                                        | Free aCTLA-4 vs. aCTLA-4 hydrogel    | 0.0362  |
|                                                        | aCTLA-4 micelle vs. aCTLA-4 hydrogel | 0.0794  |
| <b>h</b><br><b>CD25<sup>+</sup> CD8<sup>+</sup> T</b>  | Free aCTLA-4 vs. aCTLA-4 micelle     | 0.9942  |
|                                                        | Free aCTLA-4 vs. aCTLA-4 hydrogel    | >0.9999 |
|                                                        | aCTLA-4 micelle vs. aCTLA-4 hydrogel | 0.0644  |
|                                                        | Free aCTLA-4 vs. aCTLA-4 micelle     | 0.9938  |
|                                                        | Free aCTLA-4 vs. aCTLA-4 hydrogel    | 0.0402  |
|                                                        | aCTLA-4 micelle vs. aCTLA-4 hydrogel | 0.0889  |
| <b>h</b><br><b>LAG-3<sup>+</sup> CD8<sup>+</sup> T</b> | Free aCTLA-4 vs. aCTLA-4 micelle     | 0.9896  |
|                                                        | Free aCTLA-4 vs. aCTLA-4 hydrogel    | >0.9999 |
|                                                        | aCTLA-4 micelle vs. aCTLA-4 hydrogel | 0.0813  |
|                                                        | Free aCTLA-4 vs. aCTLA-4 micelle     | 0.9878  |
|                                                        | Free aCTLA-4 vs. aCTLA-4 hydrogel    | 0.0462  |
|                                                        | aCTLA-4 micelle vs. aCTLA-4 hydrogel | 0.1130  |
| <b>h</b>                                               | Free aCTLA-4 vs. aCTLA-4 micelle     | 0.9932  |

|                                                     |                                      |        |
|-----------------------------------------------------|--------------------------------------|--------|
| <b>PD-1<sup>+</sup> CD8<sup>+</sup> T</b>           | Free aCTLA-4 vs. aCTLA-4 hydrogel    | 0.9981 |
|                                                     | aCTLA-4 micelle vs. aCTLA-4 hydrogel | 0.0151 |
|                                                     | Free aCTLA-4 vs. aCTLA-4 micelle     | 0.9739 |
|                                                     | Free aCTLA-4 vs. aCTLA-4 hydrogel    | 0.0254 |
|                                                     | aCTLA-4 micelle vs. aCTLA-4 hydrogel | 0.0160 |
| <b>h<br/>Tetramer<sup>+</sup> CD8<sup>+</sup> T</b> | Free aCTLA-4 vs. aCTLA-4 micelle     | 0.9451 |
|                                                     | Free aCTLA-4 vs. aCTLA-4 hydrogel    | 0.9946 |
|                                                     | aCTLA-4 micelle vs. aCTLA-4 hydrogel | 0.0263 |
|                                                     | Free aCTLA-4 vs. aCTLA-4 micelle     | 0.8697 |
|                                                     | Free aCTLA-4 vs. aCTLA-4 hydrogel    | 0.0742 |
|                                                     | aCTLA-4 micelle vs. aCTLA-4 hydrogel | 0.0234 |
| <b>i<br/>NK</b>                                     | Free aCTLA-4 vs. aCTLA-4 micelle     | 0.9763 |
|                                                     | Free aCTLA-4 vs. aCTLA-4 hydrogel    | 0.9957 |
|                                                     | aCTLA-4 micelle vs. aCTLA-4 hydrogel | 0.0228 |
|                                                     | Free aCTLA-4 vs. aCTLA-4 micelle     | 0.9985 |
|                                                     | Free aCTLA-4 vs. aCTLA-4 hydrogel    | 0.0103 |
|                                                     | aCTLA-4 micelle vs. aCTLA-4 hydrogel | 0.0212 |
| <b>i<br/>NKT</b>                                    | Free aCTLA-4 vs. aCTLA-4 micelle     | 0.9924 |
|                                                     | Free aCTLA-4 vs. aCTLA-4 hydrogel    | 0.9926 |
|                                                     | aCTLA-4 micelle vs. aCTLA-4 hydrogel | 0.0251 |
|                                                     | Free aCTLA-4 vs. aCTLA-4 micelle     | 0.9497 |
|                                                     | Free aCTLA-4 vs. aCTLA-4 hydrogel    | 0.0147 |
|                                                     | aCTLA-4 micelle vs. aCTLA-4 hydrogel | 0.0600 |

**Supplementary Table 3. Summary of concentration dependent sol-gel and gel-sol transition of F127<sup>®</sup> and F127-g-Gelatin.**

| wt% | Sol→Gel T (°C) / Gel→Sol T (°C) |                         | Final F127 wt%<br>in F127-g-Gelatin |
|-----|---------------------------------|-------------------------|-------------------------------------|
|     | F127                            | F127-g-Gelatin          |                                     |
| 0.5 |                                 |                         | 0.32                                |
| 1   |                                 |                         | 0.65                                |
| 1.5 | Always sol<br>(4–85 °C)         | Always sol<br>(4–85 °C) | 0.97                                |
| 2   |                                 |                         | 1.29                                |
| 2.5 |                                 |                         | 1.62                                |

|      |               |                              |       |
|------|---------------|------------------------------|-------|
| 3    |               |                              | 1.94  |
| 3.5  |               |                              | 2.26  |
| 4    |               | 32 °C / Not Available (N.A.) | 2.59  |
| 4.5  |               | 31 °C / N.A.                 | 2.91  |
| 5    |               | 30 °C / N.A.                 | 3.24  |
| 5.5  |               | 30 °C / N.A.                 | 3.56  |
| 6    |               | 30 °C / N.A.                 | 3.88  |
| 6.5  |               | 29 °C / N.A.                 | 4.21  |
| 7    |               | 29 °C / N.A.                 | 4.53  |
| 7.5  |               | Always gel<br>(4–85 °C)      | 4.85  |
| 10   |               |                              | 6.47  |
| 15   |               |                              | 9.71  |
| 17.5 | 38 °C / 47 °C |                              | 11.32 |
| 20   | 28 °C / 64 °C |                              | 12.94 |
| 22.5 | 26 °C / 70 °C |                              | 14.56 |
| 25   | 22 °C / 77 °C |                              | 16.18 |

**Supplementary Table 4. Summary of concentration dependent sol-gel and gel-sol transition of Gelatin and the mixture of Gelatin and F127 (Gelatin:F127=35.1 wt.:%64.9 wt.%).**

| wt% | Gelatin<br>Gel→Sol T (°C) / Sol→Gel T (°C) | wt%   | F127/Gelatin mixture (64.9%:35.1%)<br>Gel→Sol T (°C) / Sol→Gel T (°C) |
|-----|--------------------------------------------|-------|-----------------------------------------------------------------------|
| 0.2 | Always sol<br>(4–85 °C)                    | 1     | Always sol<br>(4–85 °C)                                               |
| 0.4 |                                            | 2     |                                                                       |
| 0.6 |                                            | 4     |                                                                       |
| 0.8 | 24 °C / N.A.                               | 5     | 25 °C / N.A.                                                          |
| 1   | 25 °C / N.A.                               | 6     | 28 °C / N.A.                                                          |
| 1.2 | 28 °C / N.A.                               | 7     | 28 °C / N.A.                                                          |
| 1.4 | 31 °C / N.A.                               | 8     | Not dissolved                                                         |
| 1.6 | 32 °C / N.A.                               | 10    |                                                                       |
| 1.8 | 33 °C / N.A.                               | 12.5  |                                                                       |
| 2   | 33 °C / N.A.                               | 15    |                                                                       |
| 2.2 | 33 °C / N.A.                               | >17.5 |                                                                       |
| 2.5 | 36 °C / N.A.                               |       |                                                                       |
| 3   | 36 °C / N.A.                               |       |                                                                       |

|       |                        |  |  |
|-------|------------------------|--|--|
| 4     | 37 °C / N.A.           |  |  |
| 5     | 38 °C / N.A.           |  |  |
| > 5.5 | Not dissolved in 25 °C |  |  |

**Supplementary Table 5. Summary of CMC of F127, mixture of Gelatin and F127 (Gelatin:F127=35.1 wt. %:64.9 wt. %) and F127-g-Gelatin at RT and 37 °C.**

|                                         |       | F127         | Mixture     | F127-g-Gelatin | Fold (F127/F127-g-Gelatin) |
|-----------------------------------------|-------|--------------|-------------|----------------|----------------------------|
| CMC <sub>1</sub> (mg mL <sup>-1</sup> ) | 25 °C | 3.09±1.53    | 4.45±0.54   | 0.98±0.24      | 3.15                       |
|                                         | 37 °C | 0.044±0.0085 | 0.095±0.013 | 0.0085±0.0022  | 5.17                       |
| Fold (25 °C/37 °C)                      |       | 70.2         | 46.8        | 115.3          |                            |

**Supplementary Table 6. Summary of CMC<sub>1</sub> and CMC<sub>2</sub> of F127-g-Gelatin with or without aCTLA-4 and aCTLA-4-AF647 at 37 °C.**

| At 37 °C                                | w/o additive  | w/ aCTLA-4      | w/ aCTLA-4-AF647 |
|-----------------------------------------|---------------|-----------------|------------------|
| CMC <sub>1</sub> (mg mL <sup>-1</sup> ) | 0.0085±0.0022 | 0.014±0.0040    | 0.0037±0.0018    |
| CMC <sub>2</sub> (mg mL <sup>-1</sup> ) | None          | 0.00042±0.00027 | 0.00011±0.000041 |

**Supplementary Table 7. Statistical comparison for Fig. 5 with one-way ANOVA using Tukey post-hoc statistical hypothesis.**

| Figures | vs.                                  | P value |        |        |
|---------|--------------------------------------|---------|--------|--------|
|         |                                      | day 1   | day 7  | day 11 |
| a       | Free aCTLA-4 vs. aCTLA-4 micelle     | 0.9974  | 0.4023 | 0.6266 |
|         | Free aCTLA-4 vs. aCTLA-4 hydrogel    | 0.0009  | 0.0016 | 0.1035 |
|         | aCTLA-4 micelle vs. aCTLA-4 hydrogel | 0.0010  | 0.0080 | 0.0176 |
| b       | Free aCTLA-4 vs. aCTLA-4 micelle     | 0.0215  | 0.0543 | 0.2064 |



|          |                                      |         |        |        |
|----------|--------------------------------------|---------|--------|--------|
|          | Free aCTLA-4 vs. aCTLA-4 hydrogel    | 0.0753  | 0.1861 | 0.6534 |
|          | aCTLA-4 micelle vs. aCTLA-4 hydrogel | 0.7092  | 0.7066 | 0.5666 |
| <b>c</b> | Free aCTLA-4 vs. aCTLA-4 micelle     | 0.8605  | 0.9903 | 0.9093 |
|          | Free aCTLA-4 vs. aCTLA-4 hydrogel    | 0.84277 | 0.2455 | 0.8804 |
|          | aCTLA-4 micelle vs. aCTLA-4 hydrogel | 0.9993  | 0.2036 | 0.9971 |
| <b>d</b> | Free aCTLA-4 vs. aCTLA-4 micelle     | 0.6298  | 0.9980 | 0.0122 |
|          | Free aCTLA-4 vs. aCTLA-4 hydrogel    | 0.6552  | 0.0154 | 0.0098 |
|          | aCTLA-4 micelle vs. aCTLA-4 hydrogel | 0.2120  | 0.0169 | 0.9826 |
| <b>e</b> | Free aCTLA-4 vs. aCTLA-4 micelle     | 0.6436  | 0.9784 | 0.4783 |
|          | Free aCTLA-4 vs. aCTLA-4 hydrogel    | 0.6057  | 0.0834 | 0.1632 |
|          | aCTLA-4 micelle vs. aCTLA-4 hydrogel | 0.1943  | 0.0612 | 0.6560 |
| <b>f</b> | Free aCTLA-4 vs. aCTLA-4 micelle     | 0.0065  | 0.9790 | 0.9354 |
|          | Free aCTLA-4 vs. aCTLA-4 hydrogel    | 0.4705  | 0.1752 | 0.9930 |
|          | aCTLA-4 micelle vs. aCTLA-4 hydrogel | 0.0012  | 0.2321 | 0.8737 |
| <b>g</b> | Free aCTLA-4 vs. aCTLA-4 micelle     | 0.0228  | 0.1175 | 0.4067 |
|          | Free aCTLA-4 vs. aCTLA-4 hydrogel    | 0.7475  | 0.0369 | 0.6324 |
|          | aCTLA-4 micelle vs. aCTLA-4 hydrogel | 0.0720  | 0.7424 | 0.8961 |
| <b>h</b> | Free aCTLA-4 vs. aCTLA-4 micelle     | 0.0418  | 0.8897 | 0.2978 |
|          | Free aCTLA-4 vs. aCTLA-4 hydrogel    | 0.8764  | 0.2058 | 0.9969 |
|          | aCTLA-4 micelle vs. aCTLA-4 hydrogel | 0.0195  | 0.1034 | 0.2800 |
| <b>i</b> | Free aCTLA-4 vs. aCTLA-4 micelle     | 0.6842  | 0.9328 | 0.0848 |
|          | Free aCTLA-4 vs. aCTLA-4 hydrogel    | 0.3460  | 0.1168 | 0.0305 |
|          | aCTLA-4 micelle vs. aCTLA-4 hydrogel | 0.1031  | 0.0675 | 0.7404 |

**Supplementary Table 8. Statistical comparison for Fig. 6d with Log-rank analysis with Mantel-Cox statistical hypothesis.**

| <b>vs.</b>                   | <b>P value</b> |
|------------------------------|----------------|
| Saline vs. Free GSNO         | 0.7589         |
| Saline vs. Free aCTLA        | 0.1047         |
| Saline vs. Free GSNO+aCTLA-4 | 0.0027         |
| Saline vs. HG                | 0.7012         |
| Saline vs. GSNO/HG           | 0.5261         |
| Saline vs. aCTLA-4/HG        | 0.0953         |
| Saline vs. GSNO+aCTLA-4/HG   | 0.0027         |
| Free GSNO vs. Free aCTLA     | 0.1627         |

|                                       |        |
|---------------------------------------|--------|
| Free GSNO vs. Free GSNO+aCTLA-4       | 0.0027 |
| Free GSNO vs. HG                      | 0.9787 |
| Free GSNO vs. GSNO/HG                 | 0.7839 |
| Free GSNO vs. aCTLA-4/HG              | 0.1276 |
| Free GSNO vs. GSNO+aCTLA-4/HG         | 0.0027 |
| Free aCTLA-4 vs. Free GSNO+aCTLA-4    | 0.0198 |
| Free aCTLA-4 vs. HG                   | 0.2348 |
| Free aCTLA-4 vs. GSNO/HG              | 0.2691 |
| Free aCTLA-4 vs. aCTLA-4/HG           | 0.4065 |
| Free aCTLA-4 vs. GSNO+aCTLA-4/HG      | 0.0064 |
| Free GSNO+aCTLA-4 vs. HG              | 0.0018 |
| Free GSNO+aCTLA-4 vs. GSNO/HG         | 0.0019 |
| Free GSNO+aCTLA-4 vs. aCTLA-4/HG      | 0.2712 |
| Free GSNO+aCTLA-4 vs. GSNO+aCTLA-4/HG | 0.5402 |
| HG vs. GSNO/HG                        | 0.9854 |
| HG vs. aCTLA-4/HG                     | 0.0800 |
| HG vs. GSNO+aCTLA-4/HG                | 0.0018 |
| GSNO/HG vs. aCTLA-4/HG                | 0.1120 |
| GSNO/HG vs. GSNO+aCTLA-4/HG           | 0.0019 |
| aCTLA-4/HG vs. GSNO+aCTLA-4/HG        | 0.0244 |

**Supplementary Table 9. Statistical comparison for Fig. 6e, f with ANOVA using linear mixed-effects model.**

| vs.                                | <i>P</i> value |          |
|------------------------------------|----------------|----------|
|                                    | 1° tumor       | 2° tumor |
| Saline vs. Free GSNO               | 0.9997         | >0.9999  |
| Saline vs. Free aCTLA-4            | 0.9888         | 0.7044   |
| Saline vs. Free GSNO+aCTLA-4       | 0.0865         | 0.0106   |
| Saline vs. HG                      | >0.9999        | 0.9998   |
| Saline vs. GSNO/HG                 | 0.9993         | >0.9999  |
| Saline vs. aCTLA-4/HG              | 0.9223         | 0.2843   |
| Saline vs. GSNO+aCTLA-4/HG         | 0.0003         | 0.0015   |
| Free GSNO vs. Free aCTLA-4         | >0.9999        | 0.7166   |
| Free GSNO vs. Free GSNO+aCTLA-4    | 0.2215         | 0.0101   |
| Free GSNO vs. HG                   | >0.9999        | 0.9992   |
| Free GSNO vs. GSNO/HG              | >0.9999        | >0.9999  |
| Free GSNO vs. aCTLA-4/HG           | 0.9951         | 0.2852   |
| Free GSNO vs. GSNO+aCTLA-4/HG      | 0.0012         | 0.0014   |
| Free aCTLA-4 vs. Free GSNO+aCTLA-4 | 0.3987         | 0.3506   |
| Free aCTLA-4 vs. HG                | 0.9979         | 0.3733   |
| Free aCTLA-4 vs. GSNO/HG           | >0.9999        | 0.7756   |
| Free aCTLA-4 vs. aCTLA-4/HG        | >0.9999        | 0.9952   |
| Free aCTLA-4 vs. GSNO+aCTLA-4/HG   | 0.0086         | 0.0919   |
| Free GSNO+aCTLA-4 vs. HG           | 0.1320         | 0.0022   |

|                                       |         |        |
|---------------------------------------|---------|--------|
| Free GSNO+aCTLA-4 vs. GSNO/HG         | 0.2448  | 0.0130 |
| Free GSNO+aCTLA-4 vs. aCTLA-4/HG      | 0.6253  | 0.7900 |
| Free GSNO+aCTLA-4 vs. GSNO+aCTLA-4/HG | 0.3888  | 0.9951 |
| HG vs. GSNO/HG                        | >0.9999 | 0.9974 |
| HG vs. aCTLA-4/HG                     | 0.9699  | 0.0979 |
| HG vs. GSNO+aCTLA-4/HG                | 0.0006  | 0.0003 |
| GSNO/HG vs. aCTLA-4/HG                | 0.9970  | 0.3352 |
| GSNO/HG vs. GSNO+aCTLA-4/HG           | 0.0014  | 0.0019 |
| aCTLA-4/HG vs. GSNO+aCTLA-4/HG        | 0.0086  | 0.3534 |

**Supplementary Table 10. Statistical comparison for Supplementary Fig. 41 with ANOVA using linear mixed-effects model.**

| vs.               | <i>P</i> value |          |
|-------------------|----------------|----------|
|                   | 1° tumor       | 2° tumor |
| Saline vs. Fig. 3 | 0.6078         | 0.0110   |
| Saline vs. Fig. 6 | 0.0067         | <0.0001  |
| Fig.3 vs. Fig. 6  | 0.0380         | 0.0099   |

**Supplementary Table 11. Statistical comparison for Fig. 7c with Log-rank analysis with Mantel-Cox statistical hypothesis.**

| vs.                                   | <i>P</i> value |
|---------------------------------------|----------------|
| Saline vs. HG                         | 0.9375         |
| Saline vs. Free GSNO+aCTLA-4          | 0.2818         |
| Saline vs. GSNO+aCTLA-4/HG            | 0.0183         |
| HG vs. Free GSNO+aCTLA-4              | 0.3452         |
| HG vs. GSNO+aCTLA-4/HG                | 0.0208         |
| Free GSNO+aCTLA-4 vs. GSNO+aCTLA-4/HG | 0.5226         |

**Supplementary Table 12. Statistical comparison for Fig. 7d, e with ANOVA using linear mixed-effects model.**

| vs.           | <i>P</i> value |          |
|---------------|----------------|----------|
|               | 1° tumor       | 2° tumor |
| Saline vs. HG | 0.9822         | >0.9999  |

|                                       |        |         |
|---------------------------------------|--------|---------|
| Saline vs. Free GSNO+aCTLA-4          | 0.7800 | 0.1479  |
| Saline vs. GSNO+aCTLA-4/HG            | 0.0021 | <0.0001 |
| HG vs. Free GSNO+aCTLA-4              | 0.9392 | 0.1648  |
| HG vs. GSNO+aCTLA-4/HG                | 0.0061 | 0.0001  |
| Free GSNO+aCTLA-4 vs. GSNO+aCTLA-4/HG | 0.0281 | 0.0400  |

**Supplementary Table 13. Antibody list for Fig. 1, and Supplementary Fig. 1-19.**

| Color                    | Antibody       | Clone       | Company (Cat.#)    | Dilution |
|--------------------------|----------------|-------------|--------------------|----------|
| FITC                     | CD11c          | N418        | Biologend (117306) | 1.25:100 |
| PerCP                    | CD45           | 30-F11      | Biologend (103130) | 1.25:100 |
| PE                       | CD86           | GL-1        | Biologend (105008) | 1.25:100 |
| PE/Cy7                   | CD4            | GK1.5       | Biologend (100422) | 1.25:100 |
| APC                      | GR1            | RB6-8C5     | Biologend (108412) | 1.25:100 |
| AF700                    | CD11b          | M1/70       | Biologend (101222) | 1.25:100 |
| APC/Cy7                  | MHCII          | M5/114.15.2 | Biologend (107628) | 1.25:100 |
| BV421                    | FoxP3          | MF-14       | Biologend (126419) | 2.5:100  |
| BV605                    | CTLA-4 (CD152) | UC10-4B9    | Biologend (106323) | 2.5:100  |
| BV711                    | CD3            | 145-2C11    | Biologend (100349) | 1.25:100 |
| BV785                    | F4/80          | BM8         | Biologend (123141) | 2.5:100  |
| Zombie Aqua<br>(BUV 496) |                |             | Biologend (423102) | 1:100    |

**Supplementary Table 14. Antibody list for Fig. 2g-j, and Supplementary Fig. 22.**

| Color | Antibody       | Clone    | Company                            | Dilution |
|-------|----------------|----------|------------------------------------|----------|
| FITC  | CRT            | 1G6A7    | NOVUS Biologicals<br>(NBPI-47518F) | 1:100    |
| PerCP | CD45           | 30-F11   | Biologend (103130)                 | 1.25:100 |
| APC   | PD-1           | RMP1-30  | Biologend (109112)                 | 1.25:100 |
| AF700 | Ki-67          | 16A8     | Biologend (652420)                 | 2.5:100  |
| BV605 | CTLA-4 (CD152) | UC10-4B9 | Biologend (106323)                 | 2.5:100  |
| BV785 | PD-L1          | 10F.9G2  | Biologend (124331)                 | 2.5:100  |

Zombie Aqua  
(BUV 496)

Biolegend (423102)

1:100

---

**Supplementary Table 15. Antibody list for Fig. 3f-i.**

| <b>Color</b>             | <b>Antibody</b>  | <b>Clone</b> | <b>Company</b>             | <b>Dilution</b> |
|--------------------------|------------------|--------------|----------------------------|-----------------|
| FITC                     | CD4              | GK1.5        | Biolegend (100406)         | 1.25:100        |
| PerCP                    | CD45             | 30-F11       | Biolegend (103130)         | 1.25:100        |
| PE                       | SIINFEKL-MHCI-PE |              | NIH Tetramer Core Facility | 1:100           |
| APC                      | LAG-3            | C9B7W        | Biolegend (125210)         | 5:100           |
| AF700                    | CD25             | PC61         | Biolegend (102024)         | 0.5:100         |
| APC/Cy7                  | CD8              | 53-6.7       | Biolegend (100714)         | 2.5:100         |
| BV421                    | FoxP3            | MF-14        | Biolegend (126419)         | 2.5:100         |
| BV605                    | NK1.1            | PK136        | Biolegend (108740)         | 2.5:100         |
| BV711                    | CD3              | 145-2C11     | Biolegend (100349)         | 1.25:100        |
| BV785                    | PD-1             | 29F.1A12     | Biolegend (135225)         | 1.25:100        |
| Zombie Aqua<br>(BUV 496) |                  |              | Biolegend (423102)         | 1:100           |

---
